# Supplementary material for: Synthesis of Novel Arsonolipids and Development of Novel Arsonoliposome Types
Source: MDPI journal article supplement (doi:10.3390/pharmaceutics14081649), 2022-08-08
Supplement: s1 [file s1]

# Supplementary Materials: Synthesis of Novel Arsonolipids and Development of Novel Arsonoliposome Types

Spyridon Mourtas, Konstantina Papadia, Golfo G. Kordopati, Panayiotis V. Ioannou, Sophia G. Antimisiaris and Gerasimos M. Tsivgoulis

## Octadecyl-1-methanesulfonate (8)

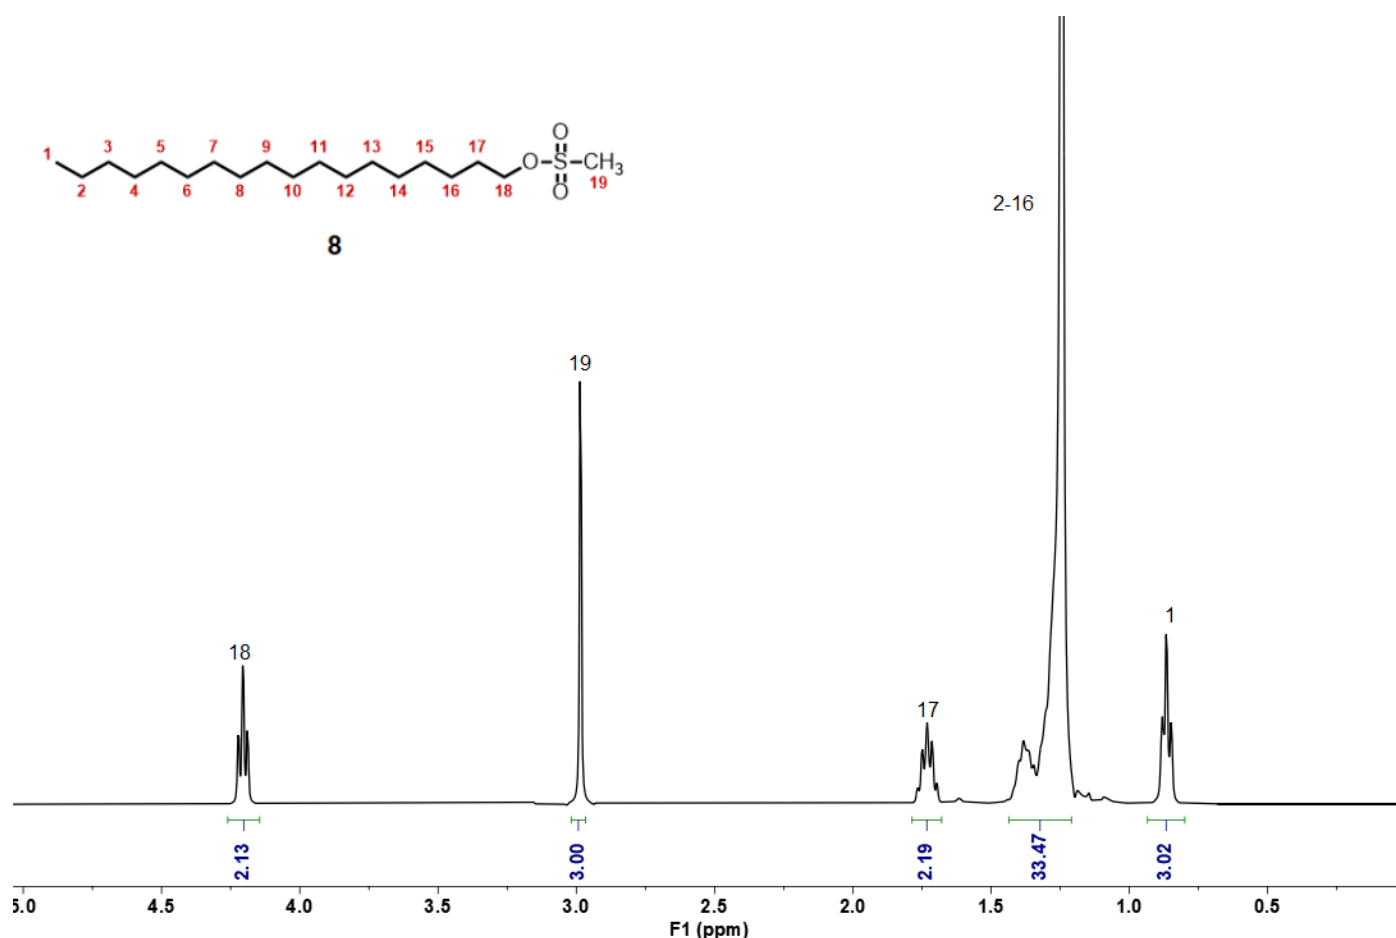

**Figure S1.** <sup>1</sup>H NMR of octadecyl-1-methanesulfonate (8) in CDCl<sub>3</sub>.

<sup>1</sup>H NMR (400 MHz, CDCl<sub>3</sub>)  $\delta$  (ppm): 4.21 (t,  $^3J_{\text{H17H18}} = 6.6$  Hz, 2H; H<sub>18</sub>), 2.99 (s, 3H; H<sub>19</sub>), 1.73 (tt,  $^3J_{\text{H16H17}} = 6.6$  Hz,  $^3J_{\text{H17H18}} = 6.6$  Hz, 2H; H<sub>17</sub>), 1.40–1.20 (br, 30H; H<sub>2</sub>–H<sub>16</sub>), 0.87 (t,  $^3J_{\text{H1H2}} = 6.7$  Hz, 3H; H<sub>1</sub>).

ESI-MS (m/z) calcd for C<sub>19</sub>H<sub>40</sub>NaO<sub>3</sub>S [M+Na]<sup>+</sup>: 371.26; found: 371.93.

*rac*-1-(2-(octadecyloxy) propoxy)octadecane (10)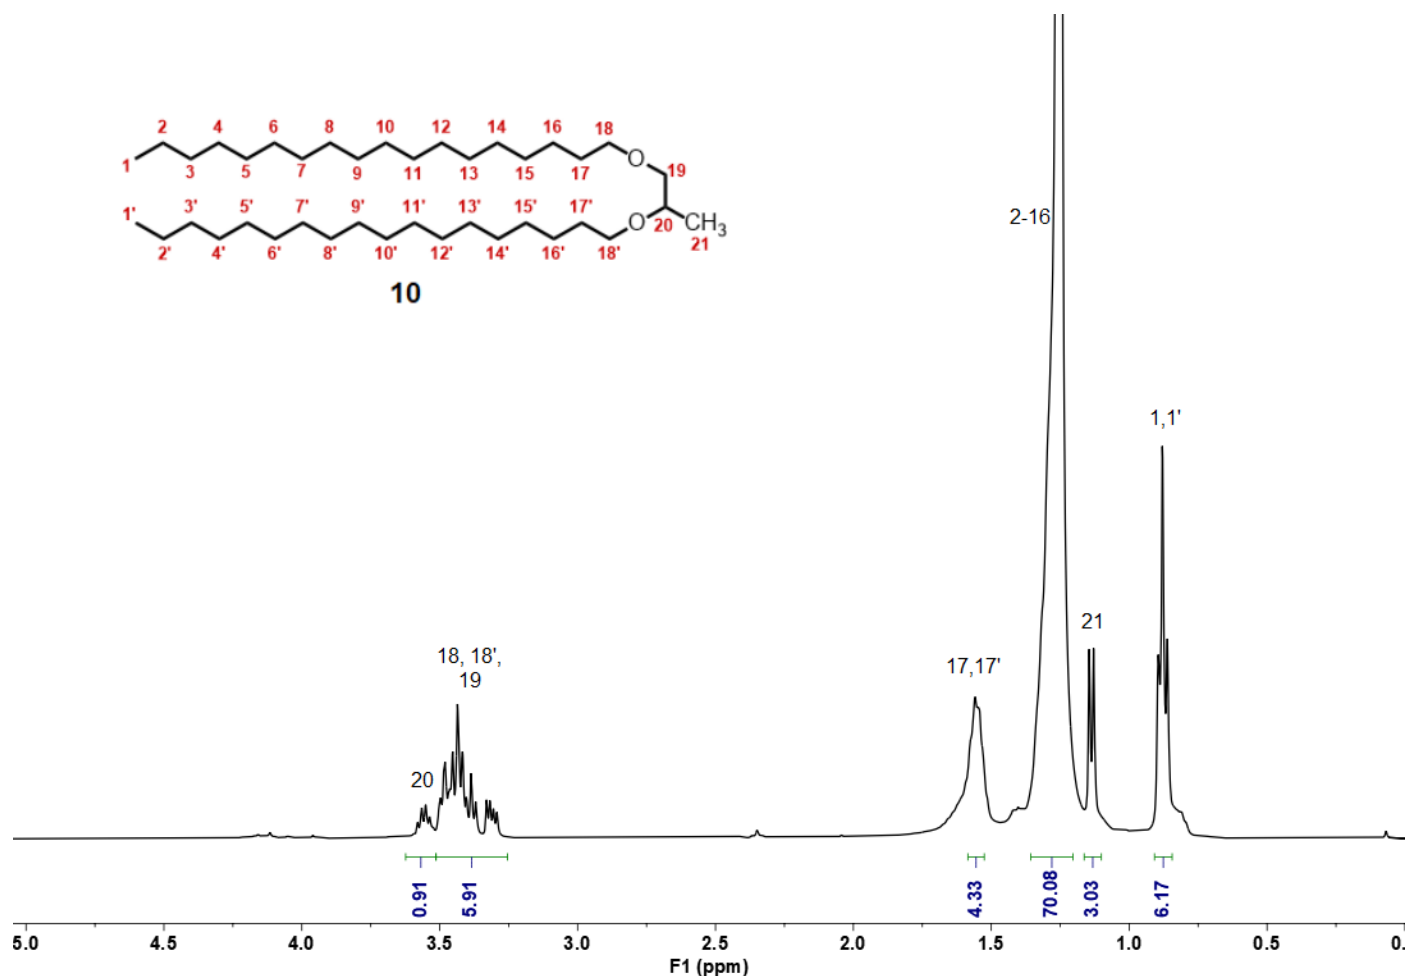

**Figure S2.** <sup>1</sup>H NMR of *rac*-1-(2-(octadecyloxy)propoxy)octadecane (10) in CDCl<sub>3</sub>.

<sup>1</sup>H NMR (400 MHz, CDCl<sub>3</sub>)  $\delta$  (ppm): 3.58–3.51 (m, 1H; H<sub>20</sub>), 3.51–3.29 (m, 6H; H<sub>18</sub>, H<sub>18'</sub>, H<sub>19</sub>), 1.61–1.51 (m, 4H; H<sub>17</sub>, H<sub>17'</sub>), 1.60–1.20 (br, 60H overlapped with H<sub>2</sub>O; H<sub>2</sub>–H<sub>16</sub>, H<sub>2'</sub>–H<sub>16'</sub>), 1.14 (d, <sup>3</sup>J<sub>H<sub>20</sub>H<sub>21</sub></sub> = 6.3 Hz, 3H; H<sub>21</sub>), 0.88 (t, <sup>3</sup>J<sub>H<sub>1</sub>H<sub>2</sub></sub> = <sup>3</sup>J<sub>H<sub>1'</sub>H<sub>2'</sub></sub> = 6.7 Hz, 6H; H<sub>1</sub>, H<sub>1'</sub>).

ESI-MS (m/z): calcd for C<sub>39</sub>H<sub>81</sub>O<sub>2</sub> [M+H]<sup>+</sup>: 581.62, found: 581.80, calcd for C<sub>39</sub>H<sub>80</sub>O<sub>2</sub>Na [M+Na]<sup>+</sup>: 603.61, found: 603.78, calcd for C<sub>39</sub>H<sub>80</sub>KO<sub>2</sub> [M+K]<sup>+</sup>: 619.58, found: 619.84.

**2-hydroxyethylarsonic acid (15)**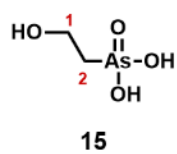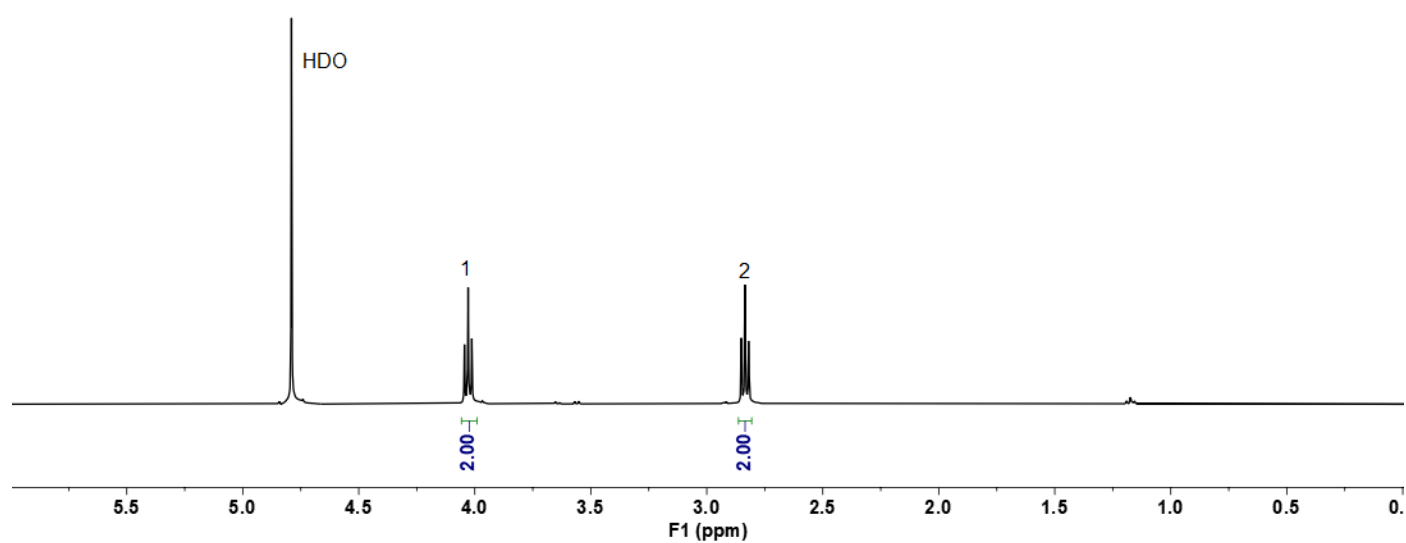

**Figure S3.**  $^1\text{H}$  NMR of 2-hydroxyethylarsonic acid (15) in  $\text{D}_2\text{O}$ .

$^1\text{H}$  NMR (400 MHz,  $\text{D}_2\text{O}$ )  $\delta$  (ppm): 4.03 (t,  $^3J_{\text{H}_1\text{H}_2} = 6.4$  Hz, 2H;  $\text{H}_1$ ), 2.84 (t,  $^3J_{\text{H}_1\text{H}_2} = 6.4$  Hz, 2H;  $\text{H}_2$ ).

*diphenyl 2-hydroxyethylarsonodithionite (16)*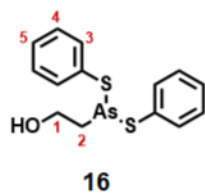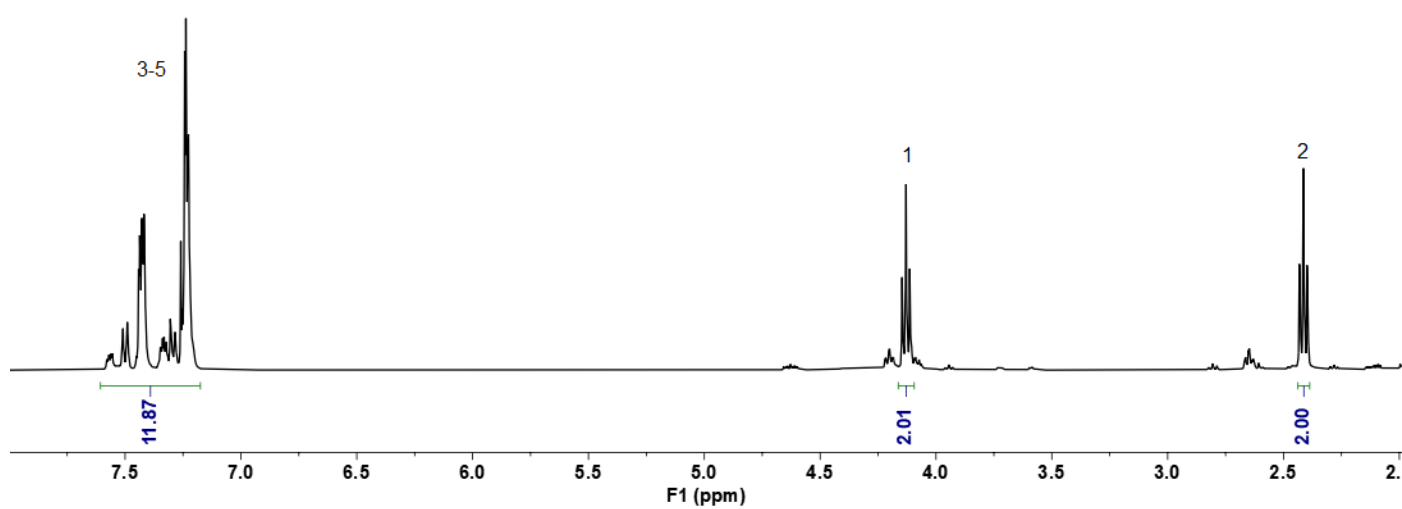

**Figure S4.**  $^1\text{H}$  NMR of diphenyl 2-hydroxyethylarsonodithionite (crude oily product) (**16**) in  $\text{CDCl}_3$ .

$^1\text{H}$  NMR (400 MHz,  $\text{CDCl}_3$ , crude oily product)  $\delta$  (ppm): 7.61–7.18 (m, 10H overlapped with  $\text{CHCl}_3$ ;  $\text{H}_3$ – $\text{H}_5$ ), 4.13 (t,  $^3J_{\text{H}_1\text{H}_2}$  = 6.6 Hz, 2H;  $\text{H}_1$ ), 2.41 (t,  $^3J_{\text{H}_1\text{H}_2}$  = 6.6 Hz, 2H;  $\text{H}_2$ ).

## 2-(palmitoyloxy)ethylarsonic acid (18)

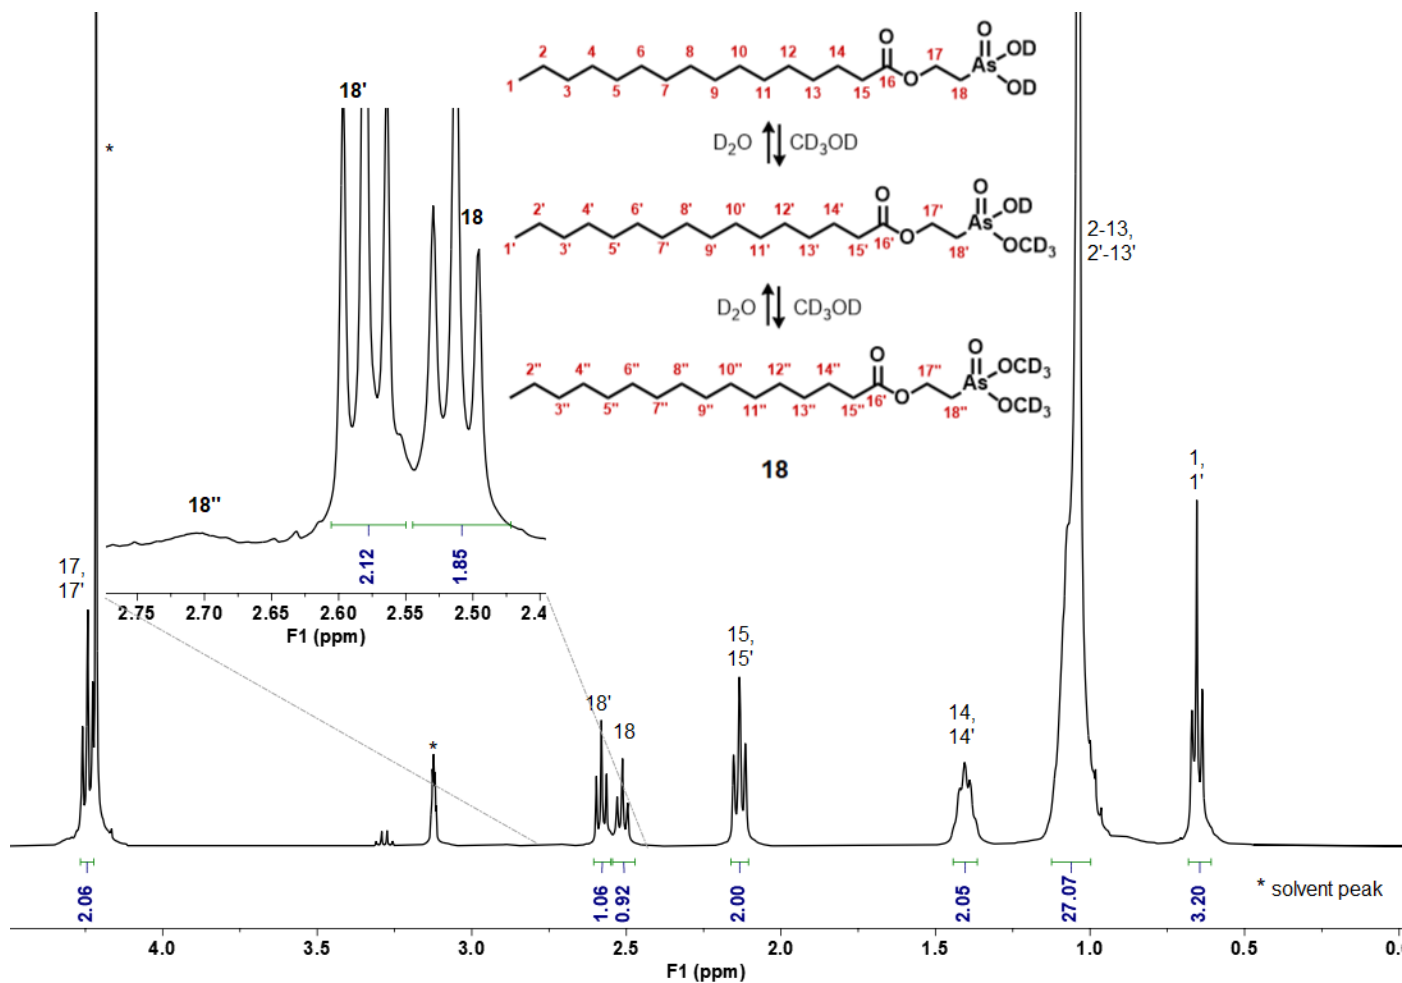

**Figure S5.**  $^1\text{H}$  NMR of 2-(palmitoyloxy)ethylarsonic acid (18) in  $\text{CDCl}_3/\text{CD}_3\text{OD}$ , 2:1.

$^1\text{H}$  NMR (400 MHz,  $\text{CDCl}_3/\text{CD}_3\text{OD}$  2:1)  $\delta$  (ppm): 4.24 (t,  $^3J_{\text{H}17\text{H}18} = 6.6$  Hz,  $^3J_{\text{H}17'\text{H}18'} = 6.6$  Hz, 2H;  $\text{H}_{17}$ ,  $\text{H}_{17'}$ ), [2.58 (t,  $^3J_{\text{H}17'\text{H}18'} = 6.6$  Hz;  $\text{H}_{18'}$ ), 2.51 (t,  $^3J_{\text{H}17\text{H}18} = 6.6$  Hz;  $\text{H}_{18}$ ), 2H], 2.13 (t,  $^3J_{\text{H}14\text{H}15} = 6.6$  Hz,  $^3J_{\text{H}14'\text{H}15'} = 6.6$  Hz, 2H;  $\text{H}_{15}$ ,  $\text{H}_{15'}$ ), 1.44–1.67 (m, 2H;  $\text{H}_{14}$ ,  $\text{H}_{14'}$ ), 1.13–1.00 (bs, 24H overlapped with  $-\text{OH}$ ,  $\text{H}_2$ – $\text{H}_{13}$ ,  $\text{H}_2'$ – $\text{H}_{13'}$ ), 0.65 (t,  $^3J_{\text{H}1\text{H}2} = 6.7$  Hz,  $^3J_{\text{H}1'\text{H}2'} = 6.7$  Hz, 3H;  $\text{H}_1$ ,  $\text{H}_{1'}$ ).

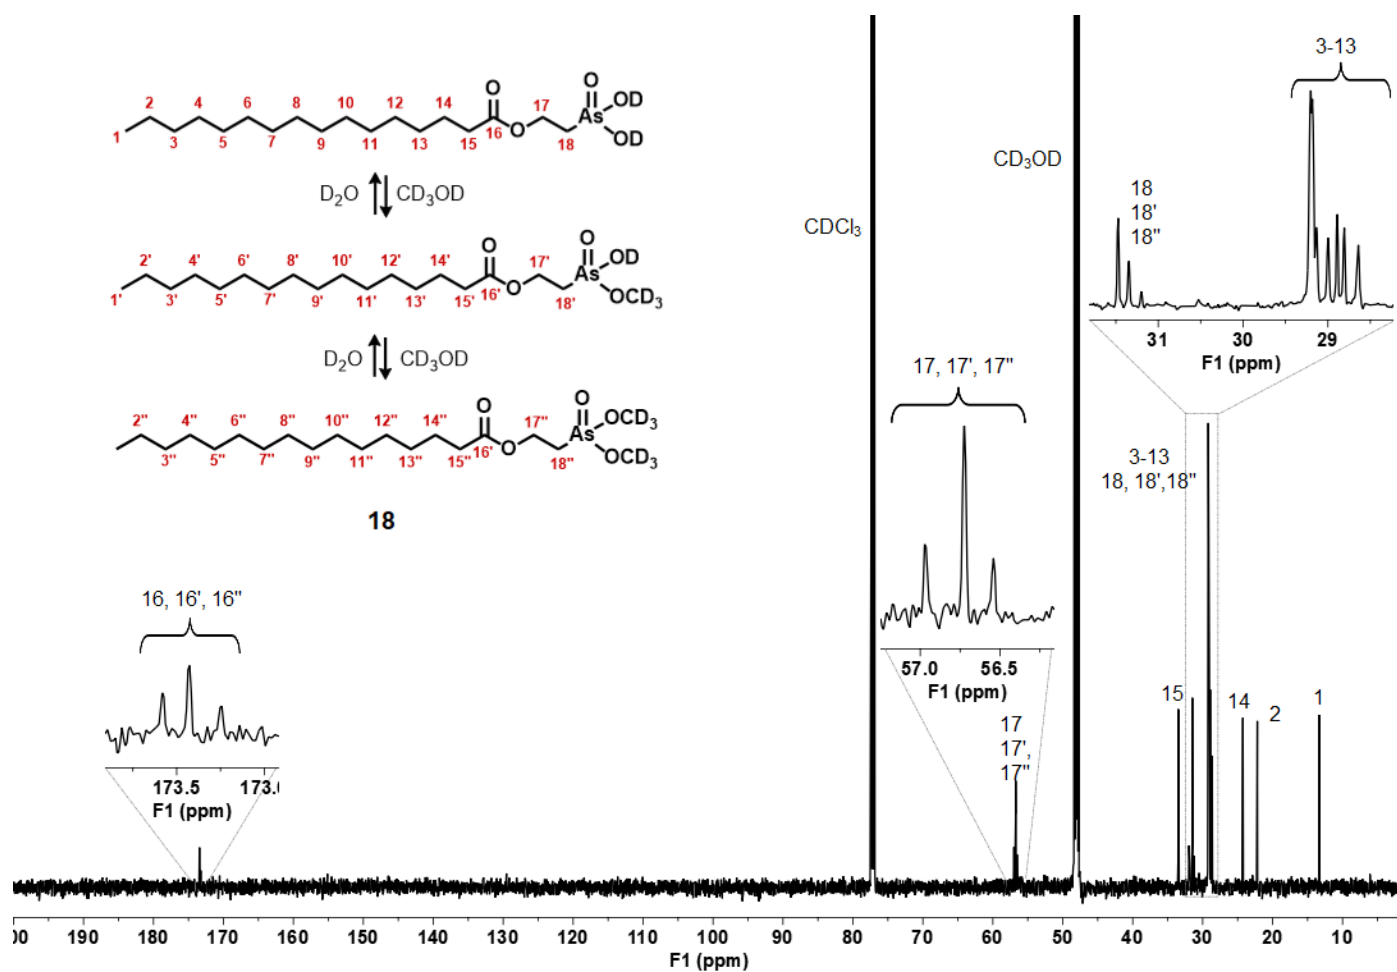

**Figure S6.** <sup>13</sup>C NMR of 2-(palmitoyloxy)ethylarsonic acid (18) in CDCl<sub>3</sub>/CD<sub>3</sub>OD, 1:1.

<sup>13</sup>C NMR (151 MHz, CDCl<sub>3</sub>/CD<sub>3</sub>OD 1:1) δ (ppm): [173.6, 173.4, 173.2 (C<sub>16</sub>, C<sub>16'</sub>, C<sub>16''</sub>)], [57.0, 56.7, 56.5, (C<sub>17</sub>, C<sub>17'</sub>, C<sub>17''</sub>)], 33.5 (C<sub>15</sub>), [31.5, 31.3, 31.2 (C<sub>18</sub>, C<sub>18'</sub>, C<sub>18''</sub>)], [29.2, 29.2, 29.1, 29.0, 28.9, 28.8, 28.6 (C<sub>3</sub>-C<sub>13</sub>)], 24.2 (C<sub>14</sub>), 22.2 (C<sub>2</sub>), 13.3 (C<sub>1</sub>).

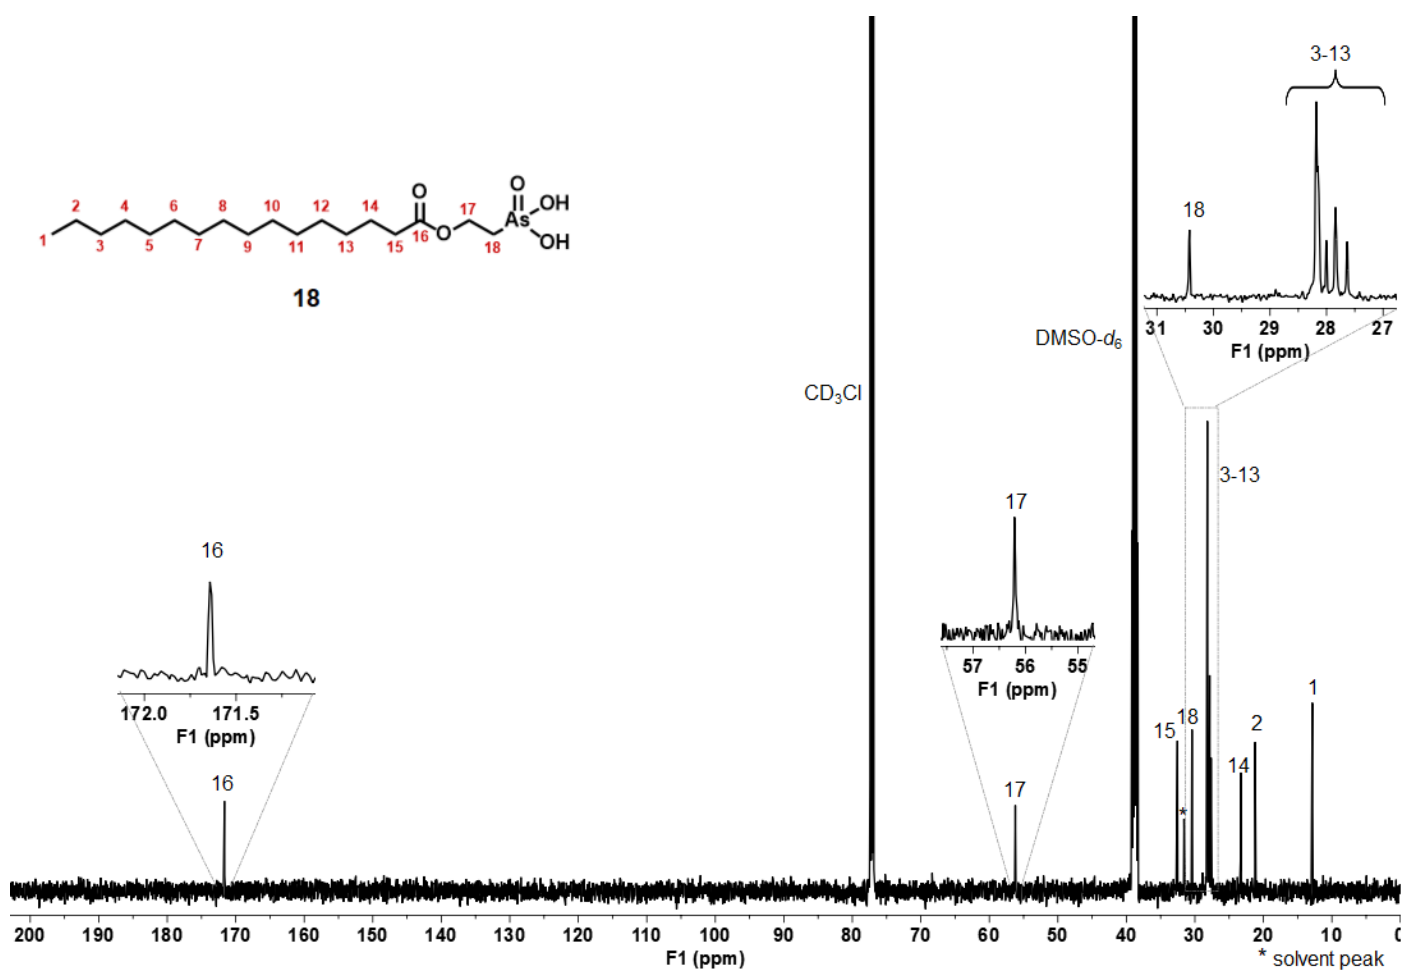

**Figure S7.**  $^{13}\text{C}$  NMR of 2-(palmitoyloxy)ethylarsonic acid (**18**) in  $\text{CDCl}_3/\text{DMSO-}d_6$ , 1:1.

$^{13}\text{C}$  NMR (151 MHz,  $\text{CDCl}_3/\text{DMSO-}d_6$  1:1)  $\delta$  (ppm): 171.6 ( $\text{C}_{16}$ ), 56.2 ( $\text{C}_{17}$ ), 32.5 ( $\text{C}_{15}$ ), 31.6 ( $\text{C}_{18}$ ), [28.2, 28.0, 27.8, 27.6 ( $\text{C}_3\text{--C}_{13}$ )], 23.3 ( $\text{C}_{14}$ ), 21.2 ( $\text{C}_2$ ), 12.9 ( $\text{C}_1$ ).

ESI-MS ( $m/z$ ): calcd for  $\text{C}_{19}\text{H}_{40}\text{AsO}_5$  [ $\text{M}(\text{OH}, \text{OCH}_3) + \text{H}$ ] $^+$ : 423.21, found: 423.75, calcd for  $\text{C}_{20}\text{H}_{41}\text{AsO}_5$  [ $\text{M}(\text{OCH}_3, \text{OCH}_3) + \text{H}$ ] $^+$ : 437.22, found: 437.72, calcd for  $\text{C}_{20}\text{H}_{41}\text{AsNaO}_5$  [ $(\text{OCH}_3, \text{OCH}_3) + \text{Na}$ ] $^+$ : 459.21, found: 459.74, calcd for  $\text{C}_{20}\text{H}_{41}\text{AsKO}_5$  [ $\text{M}(\text{OCH}_3, \text{OCH}_3) + \text{K}$ ] $^+$ : 475.18, found: 475.58, calcd for  $\text{C}_{40}\text{H}_{82}\text{As}_2\text{NaO}_{10}$  [ $2\text{M}(\text{OCH}_3, \text{OCH}_3) + \text{Na}$ ] $^+$ : 895.42, found: 895.63.

3-O-benzyl-sn-Glycerol / 3-(benzyloxy)propane-1,2-diol (**21**)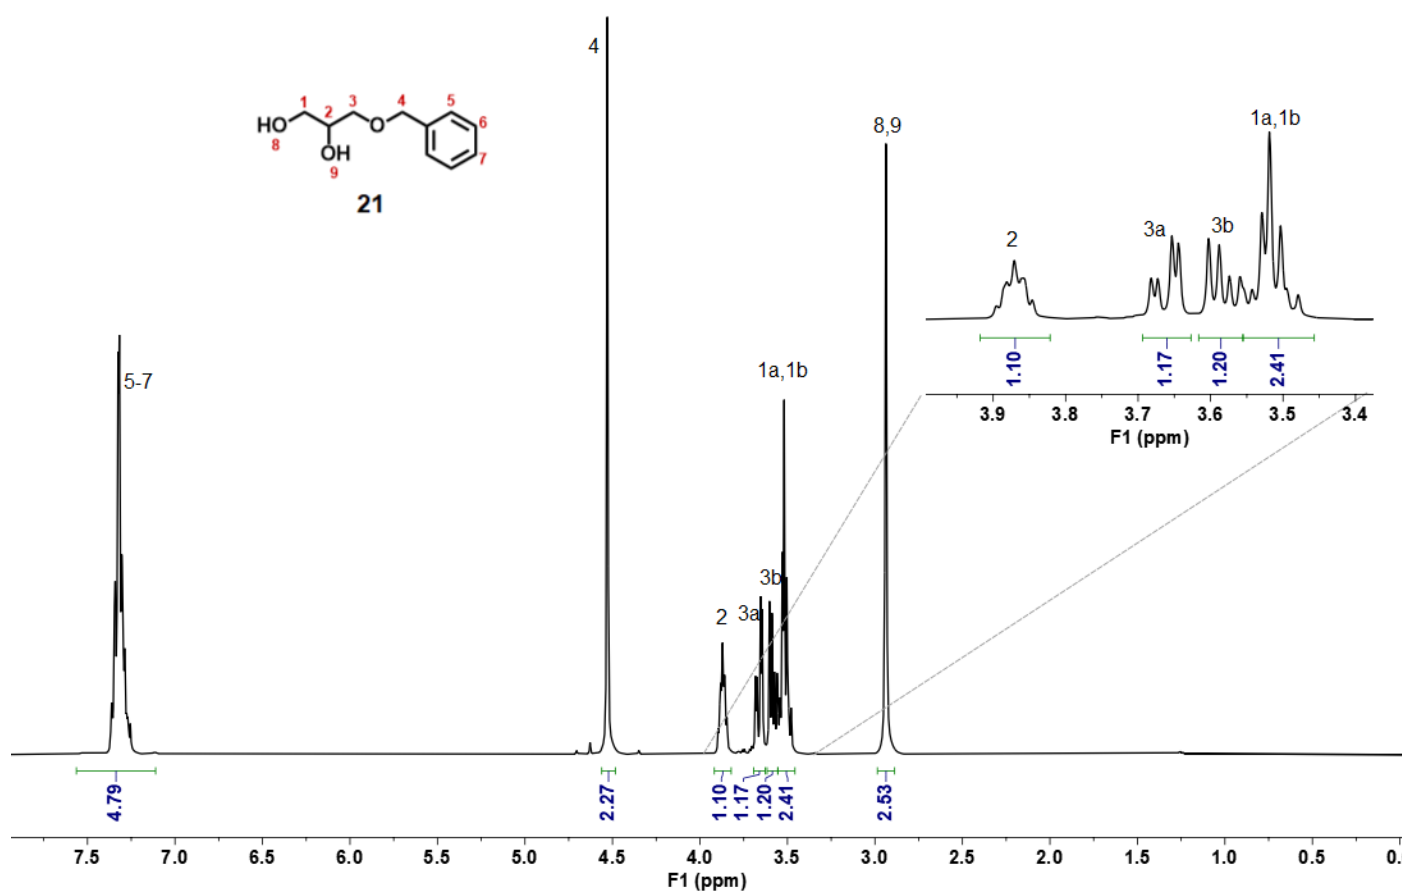

**Figure S8.** <sup>1</sup>H NMR of 3-O-benzyl-sn-Glycerol / 3-(benzyloxy)propane-1,2-diol (**21**) in CDCl<sub>3</sub>.

<sup>1</sup>H NMR (400 MHz, CDCl<sub>3</sub>)  $\delta$  (ppm): 7.48-7.12 (m, 5H; H<sub>5</sub>-H<sub>7</sub>), 4.53 (s, 2H; H<sub>4</sub>), 3.90-3.82 (X part of an ABXMN system, 1H; H<sub>2</sub>), 3.66 (A part of an ABXMN system, <sup>3</sup>J<sub>H<sub>3a</sub>H<sub>2</sub></sub> = 3.7 Hz, <sup>2</sup>J<sub>H<sub>3a</sub>H<sub>3b</sub></sub> = -11.5 Hz, 1H; H<sub>3a</sub>), 3.58 (B part of an ABXMN system, <sup>2</sup>J<sub>H<sub>3b</sub>H<sub>2</sub></sub> = 5.8 Hz, <sup>3</sup>J<sub>H<sub>3a</sub>H<sub>3b</sub></sub> = -11.5 Hz, 1H; H<sub>3b</sub>), 3.53 (M part of an ABXMN system, <sup>3</sup>J<sub>H<sub>1a</sub>H<sub>2</sub></sub> = 4.0 Hz, <sup>2</sup>J<sub>H<sub>1a</sub>H<sub>1b</sub></sub> = -9.7 Hz, 1H; H<sub>1a</sub>), 3.50 (N part of an ABXMN system, <sup>3</sup>J<sub>H<sub>1b</sub>H<sub>2</sub></sub> = 6.5 Hz, <sup>2</sup>J<sub>H<sub>1a</sub>H<sub>1b</sub></sub> = -9.7 Hz, 1H; H<sub>1b</sub>), 2.94 (s, 2H; H<sub>8</sub>, H<sub>9</sub>).



*rac*-1-((2,3-bis(octadecyloxy)propoxy)methyl)benzene (**22**)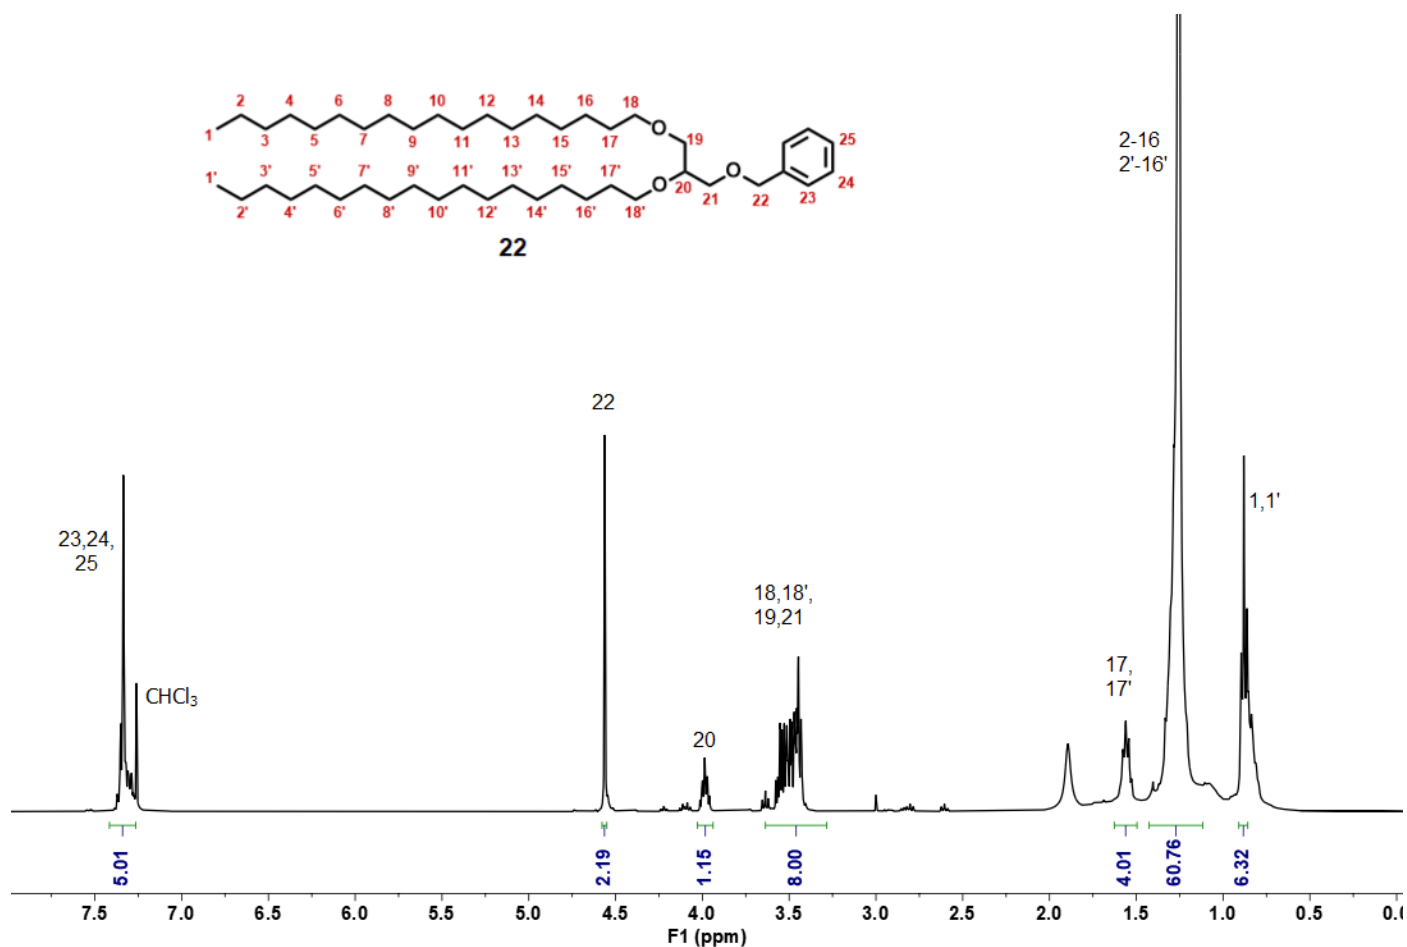

**Figure S9.**  $^1\text{H}$  NMR of *rac*-1-((2,3-bis(octadecyloxy)propoxy)methyl)benzene (**22**) in  $\text{CDCl}_3$ .

$^1\text{H}$  NMR (400 MHz,  $\text{CDCl}_3$ )  $\delta$  (ppm): 7.41–7.27 (m, 5H;  $\text{H}_{23}\text{--H}_{25}$ ), 4.56 (s, 2H;  $\text{H}_{22}$ ), 4.01–3.96 (m, 1H;  $\text{H}_{20}$ ), 3.65–3.42 (m, 8H;  $\text{H}_{18}$ ,  $\text{H}_{18'}$ ,  $\text{H}_{19}$ ,  $\text{H}_{21}$ ), 1.63–1.50 (m, 4H;  $\text{H}_{17}$ ,  $\text{H}_{17'}$ ), 1.43–1.12 (br, 60H;  $\text{H}_2\text{--H}_{16}$ ,  $\text{H}_2'\text{--H}_{16'}$ ), 0.88 (t,  $^3J_{\text{H}_1\text{H}_2} = 6.7$  Hz, 6H;  $\text{H}_1$ ,  $\text{H}_{1'}$ ).

ESI-MS ( $m/z$ ): calcd for  $\text{C}_{46}\text{H}_{87}\text{O}_3$  [ $\text{M}+\text{H}$ ] $^+$ : 687.6655, found: 687.98, calcd for  $\text{C}_{46}\text{H}_{86}\text{NaO}_3$  [ $\text{M}+\text{Na}$ ] $^+$ : 709.6475, found: 710.00, calcd for  $\text{C}_{46}\text{H}_{86}\text{O}_3\text{K}$  [ $\text{M}+\text{K}$ ] $^+$ : 725.62, found: 725.98.

*rac*-2,3-bis(octadecyloxy)propan-1-ol (23)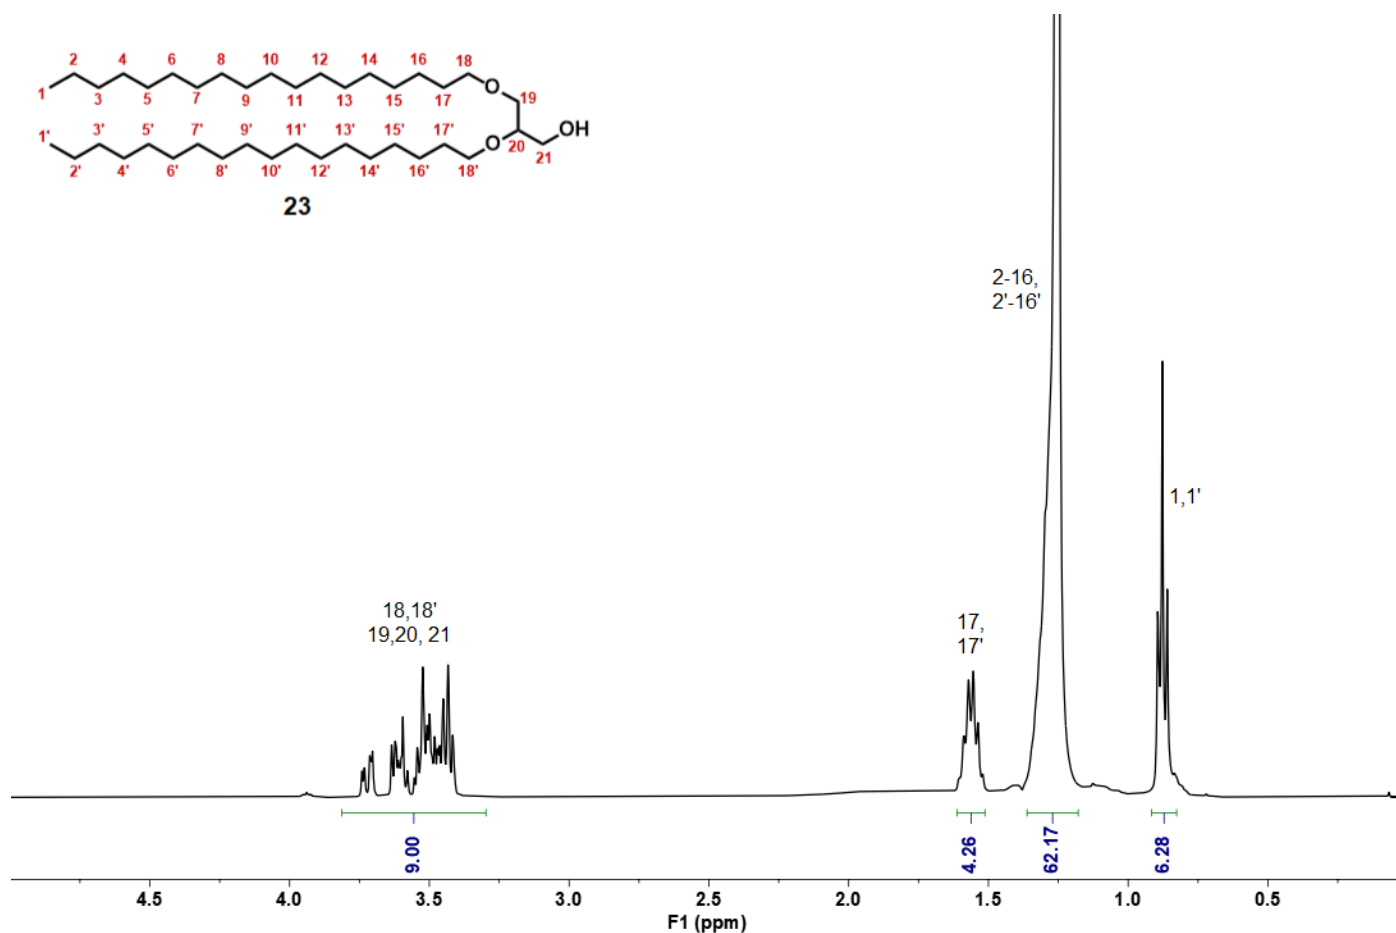

**Figure S10.** <sup>1</sup>H NMR of *rac*-2,3-bis(octadecyloxy)propan-1-ol (23) in CDCl<sub>3</sub>.

<sup>1</sup>H NMR (400 MHz, CDCl<sub>3</sub>)  $\delta$  (ppm): 3.72-3.42 (m, 9H; H<sub>18</sub>, H<sub>18'</sub>, H<sub>19</sub>, H<sub>20</sub>, H<sub>21</sub>), 1.60-1.52 (m, 4H; H<sub>17</sub>, H<sub>17'</sub>), 1.33-1.25 (br, 60H; H<sub>2</sub>-H<sub>16</sub>, H<sub>2'</sub>-H<sub>16'</sub>), 0.88 (t, <sup>3</sup>J<sub>H1H2</sub> = 6.7 Hz, 6H; H<sub>1</sub>, H<sub>1'</sub>).

ESI-MS (m/z): calcd for C<sub>39</sub>H<sub>80</sub>NaO<sub>3</sub> [M+Na]<sup>+</sup>: 619.60, found: 619.89.

*rac*-2,3-bis(octadecyloxy)propanoic acid (**24**)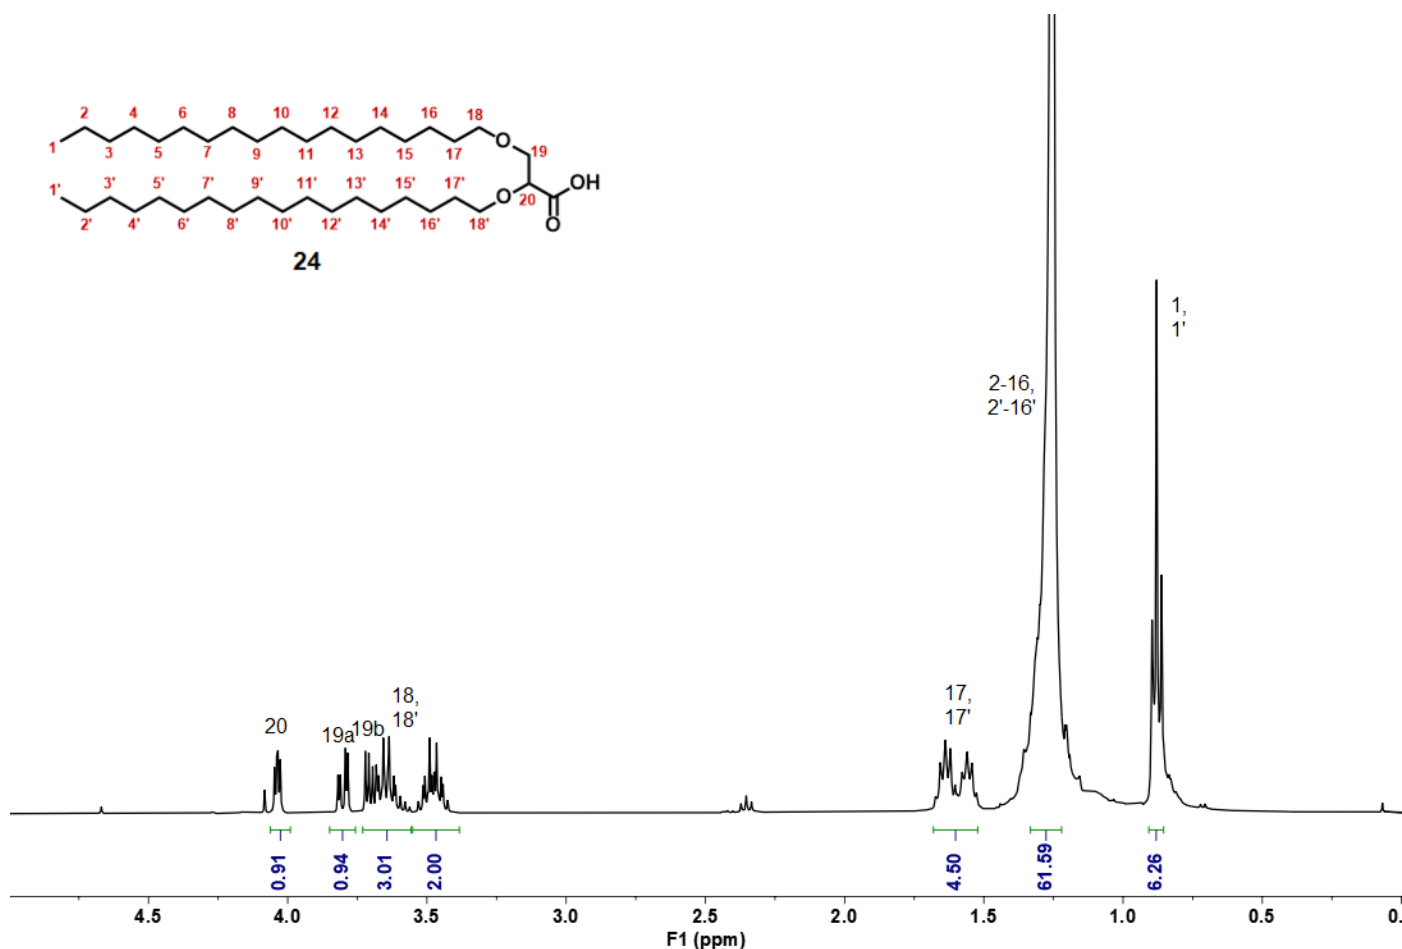

**Figure S11.** <sup>1</sup>H NMR of *rac*-2,3-bis(octadecyloxy)propanoic acid (**24**) in CDCl<sub>3</sub>.

<sup>1</sup>H NMR (400 MHz, CDCl<sub>3</sub>)  $\delta$  (ppm): 4.04 (X part of an ABX system,  $^3J_{\text{H19aH20}} = 5.1$  Hz,  $^3J_{\text{H19bH20}} = 3.1$  Hz, 1H; H<sub>20</sub>), 3.80 (A part of an ABX system,  $^3J_{\text{H19aH20}} = 3.1$  Hz,  $^2J_{\text{H19aH19b}} = -10.5$  Hz, 1H; H<sub>19a</sub>), 3.7 (B part of an ABX system,  $^3J_{\text{H19bH20}} = 5.1$  Hz,  $^2J_{\text{H19aH19b}} = -10.5$  Hz, 1H; H<sub>19b</sub>, overlapped with other signals), 3.75–3.37 (m, 4H; H<sub>18</sub>, H<sub>18'</sub>, overlapped with the signal of H<sub>19b</sub>), 1.67–1.53 (m, 4H; H<sub>17</sub>, H<sub>17'</sub>), 1.33–1.22 (br, 60H; H<sub>2</sub>–H<sub>16</sub>, H<sub>2'</sub>–H<sub>16'</sub>), 0.88 (t,  $^3J_{\text{H1H2}} = 6.7$  Hz, 6H; H<sub>1</sub>, H<sub>1'</sub>).

ESI-MS (m/z) calcd for C<sub>39</sub>H<sub>78</sub>NaO<sub>4</sub> [M+Na]<sup>+</sup>: 633.58, found: 633.63, calcd for C<sub>39</sub>H<sub>78</sub>O<sub>4</sub>K [M+K]<sup>+</sup>: 649.55, found: 649.60, calcd for C<sub>78</sub>H<sub>156</sub>NaO<sub>8</sub> [2M+Na]<sup>+</sup>: 1244.17, found: 1244.46, calcd for C<sub>78</sub>H<sub>156</sub>O<sub>8</sub>K [2M+K]<sup>+</sup>: 1260.14, found: 1260.32.

*rac*-2-(2,3-bis(octadecyloxy)ethylarsonic acid [As-Lipid] (27)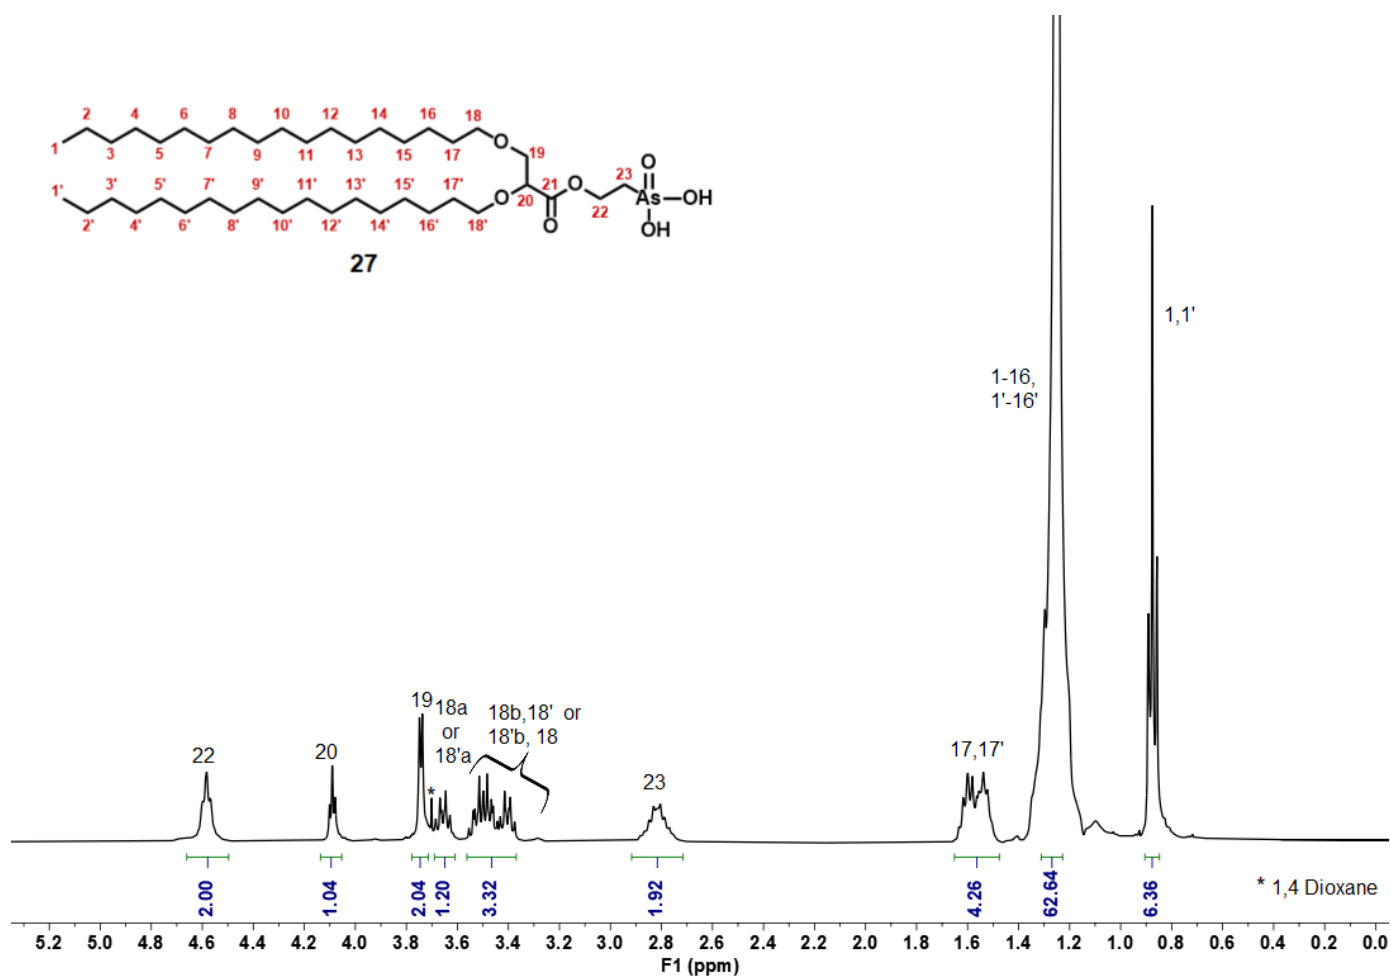

**Figure S12.**  $^1\text{H}$  NMR of *rac*-2-(2,3-bis(octadecyloxy)ethylarsonic acid [As-Lipid] (27) in  $\text{CDCl}_3$ .

$^1\text{H}$  NMR (400 MHz,  $\text{CDCl}_3$ )  $\delta$  (ppm): 4.58 (t,  $^3J_{\text{H}22\text{H}23} = 7.0$  Hz, 2H;  $\text{H}_{22}$ ), 4.09 (t,  $^3J_{\text{H}19\text{H}20} = 4.6$  Hz, 1H;  $\text{H}_{20}$ ), 3.74 (d,  $^3J_{\text{H}19\text{H}20} = 4.6$  Hz, 2H;  $\text{H}_{19}$ ), 3.69–3.61 (m, 1H;  $\text{H}_{18a}$  or  $\text{H}_{18'a}$ ), 3.56–3.37 [m, 3H; ( $\text{H}_{18b}$ ,  $\text{H}_{18'}$  or  $\text{H}_{18'b}$ ,  $\text{H}_{18}$ )], 2.92–2.72 (m, 2H;  $\text{H}_{23}$ ), 1.65–1.48 (m, 4H;  $\text{H}_{17}$ ,  $\text{H}_{17'}$ ), 1.31–1.23 (br, 60H;  $\text{H}_2$ ;  $\text{H}_2\text{-H}_{16}$ ,  $\text{H}_2'\text{-H}_{16'}$ ), 0.87 (t,  $^3J_{\text{H}1\text{H}2} = 6.7$  Hz, 6H;  $\text{H}_1$ ,  $\text{H}_{1'}$ ).

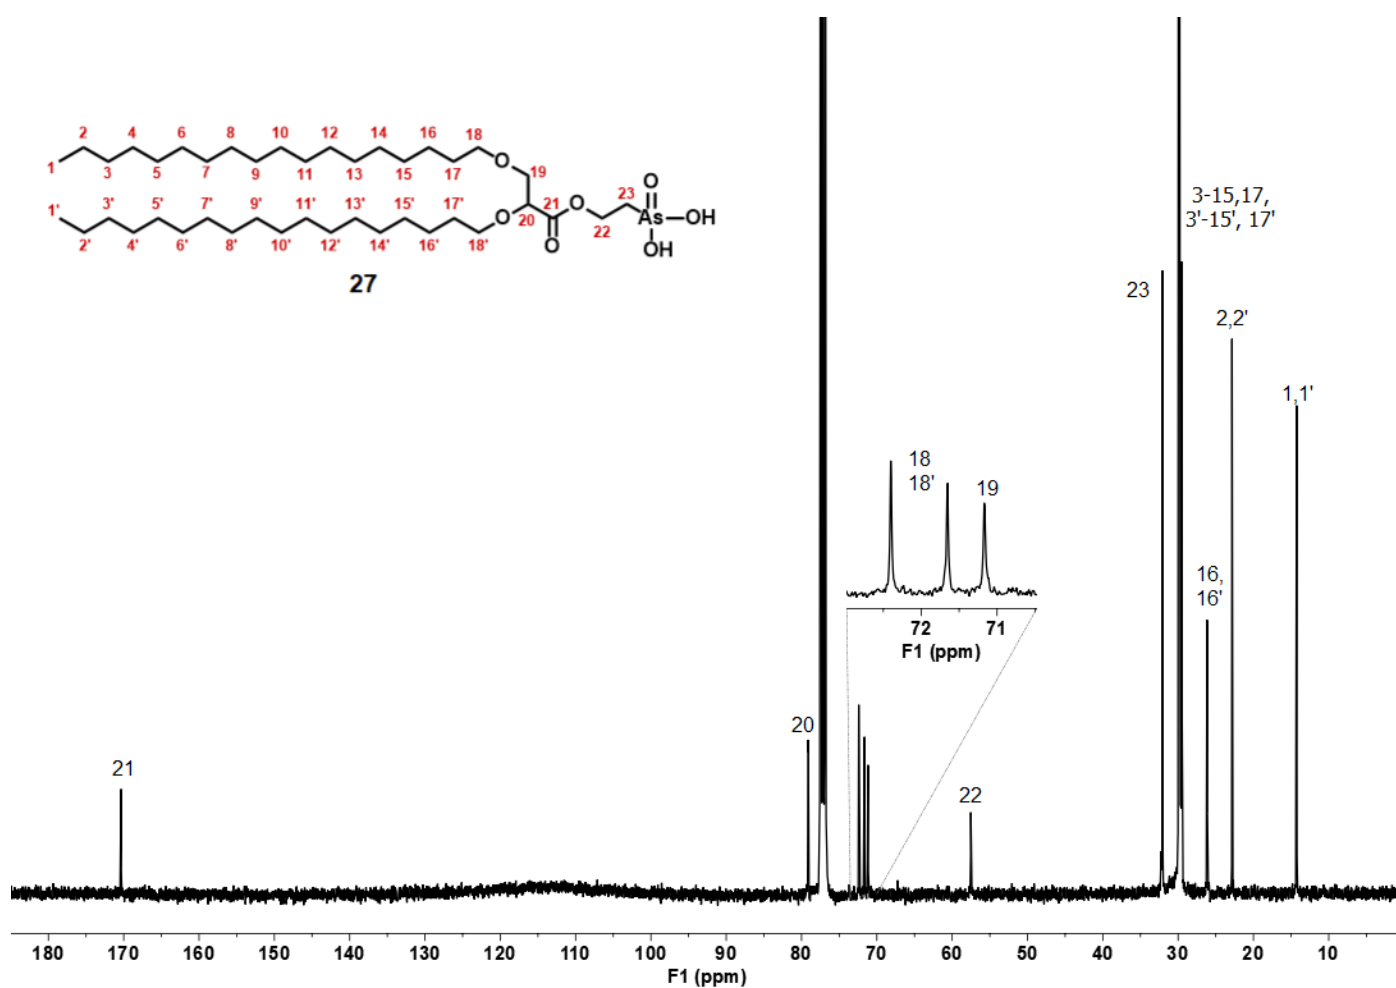

**Figure S13.**  $^{13}\text{C}$  NMR of *rac*-2-(2,3-bis(octadecyloxy)ethyl)arsonic acid [As-Lipid] (**27**) in  $\text{CDCl}_3$ .

$^{13}\text{C}$  NMR (101 MHz,  $\text{CDCl}_3$ )  $\delta$  (ppm): 170.4 (C<sub>21</sub>), 79.1 (C<sub>20</sub>), [72.4, 71.7 (C<sub>18</sub>, C<sub>18'</sub>), 71.2 (C<sub>19</sub>), 57.5 (C<sub>22</sub>), 32.1 (C<sub>23</sub>), [29.9, 29.8, 29.7, 29.6, 29.6, 29.5; (C<sub>3</sub>-C<sub>15</sub>, C<sub>17</sub>, C<sub>3'</sub>-C<sub>15'</sub>)], [26.2, 26.1; (C<sub>16</sub>, C<sub>16'</sub>)], 22.8 (C<sub>2</sub>, C<sub>2'</sub>), 14.3 (C<sub>1</sub>, C<sub>1'</sub>).

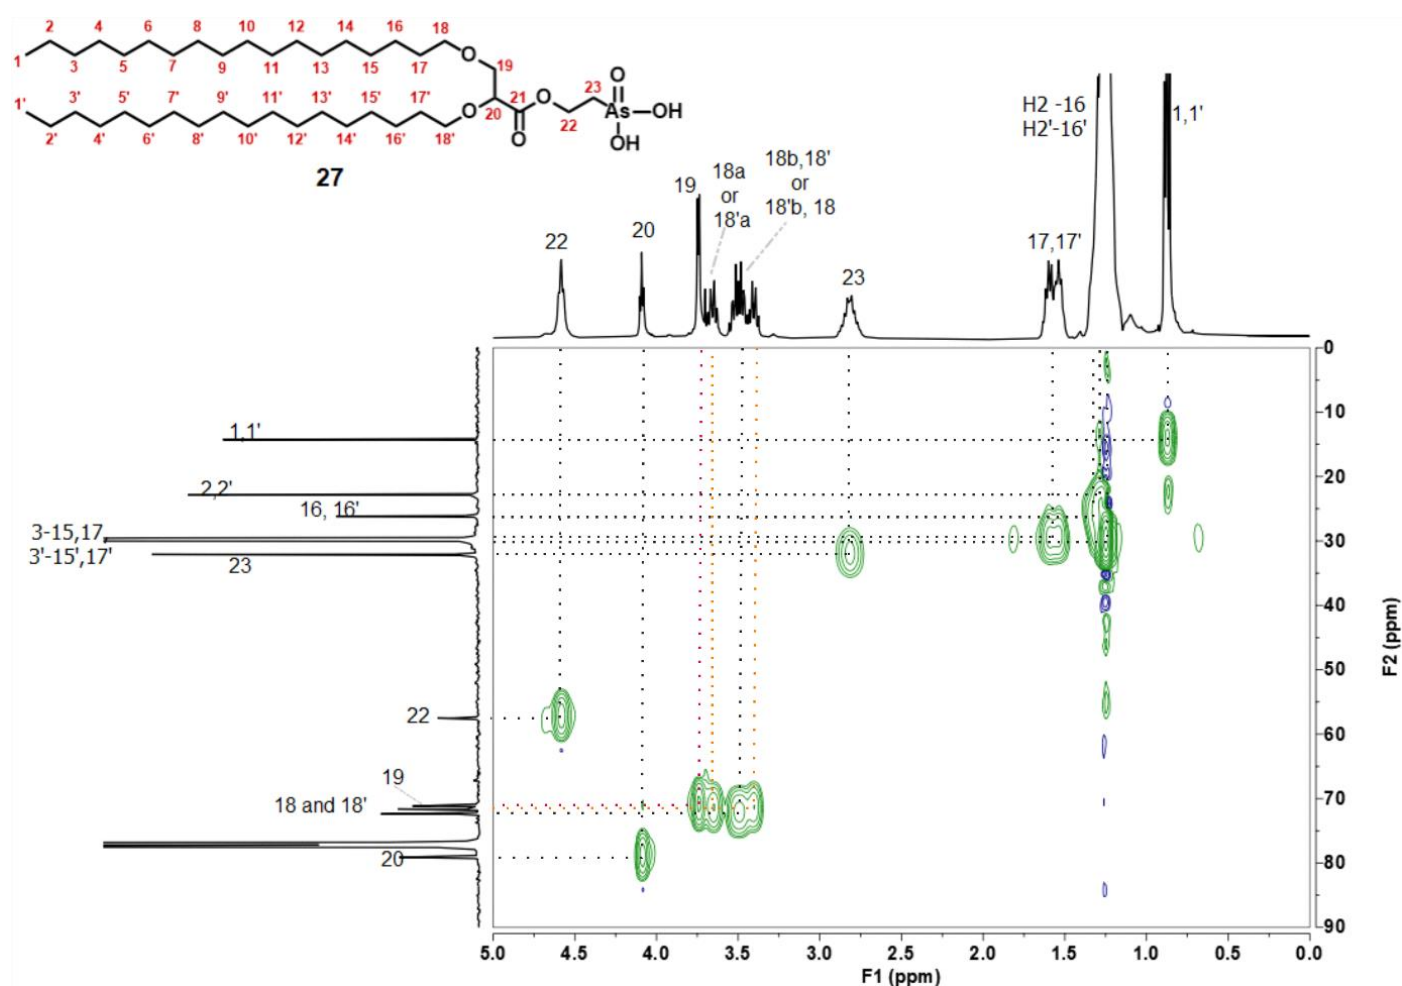

**Figure S14.**  $^1\text{H}$ - $^{13}\text{C}$  HSQC of *rac*-2-(2,3-bis(octadecyloxy)ethyl)arsonic acid [As-Lipid] (27) in  $\text{CDCl}_3$ .

$^1\text{H}$  NMR (400 MHz,  $\text{CDCl}_3$ )  $\delta$  (ppm): 4.58 (t,  $^3J_{\text{H}22\text{H}23} = 7.0$  Hz, 2H;  $\text{H}_{22}$ ), 4.09 (t,  $^3J_{\text{H}19\text{H}20} = 4.6$  Hz, 1H;  $\text{H}_{20}$ ), 3.74 (d,  $^3J_{\text{H}19\text{H}20} = 4.6$  Hz, 2H;  $\text{H}_{19}$ ), 3.69–3.61 (m, 1H;  $\text{H}_{18\text{a}}$  or  $\text{H}_{18'\text{a}}$ ), 3.56–3.37 [m, 3H; ( $\text{H}_{18\text{b}}$ ,  $\text{H}_{18'}$  or  $\text{H}_{18'\text{b}}$ ,  $\text{H}_{18}$ )], 2.92–2.72 (m, 2H;  $\text{H}_{23}$ ), 1.65–1.48 (m, 4H;  $\text{H}_{17}$ ,  $\text{H}_{17'}$ ), 1.31–1.23 (br, 60H;  $\text{H}_2$ ;  $\text{H}_2\text{--H}_{16}$ ,  $\text{H}_2'\text{--H}_{16'}$ ), 0.87 (t,  $^3J_{\text{H}1\text{H}2} = 6.7$  Hz, 6H;  $\text{H}_1$ ,  $\text{H}_{1'}$ ).

$^{13}\text{C}$  NMR (101 MHz,  $\text{CDCl}_3$ )  $\delta$  (ppm): 170.4 ( $\text{C}_{21}$ ), 79.1 ( $\text{C}_{20}$ ), [72.4, 71.7 ( $\text{C}_{18}$ ,  $\text{C}_{18'}$ ), 71.2 ( $\text{C}_{19}$ ), 57.5 ( $\text{C}_{22}$ ), 32.1 ( $\text{C}_{23}$ ), [29.9, 29.8, 29.7, 29.6, 29.6, 29.5; ( $\text{C}_3\text{--C}_{15}$ ,  $\text{C}_{17}$ ,  $\text{C}_3'\text{--C}_{15'}$ )], [26.2, 26.1; ( $\text{C}_{16}$ ,  $\text{C}_{16'}$ )], 22.8 ( $\text{C}_2$ ,  $\text{C}_{2'}$ ), 14.3 ( $\text{C}_1$ ,  $\text{C}_{1'}$ ).

ESI-MS ( $m/z$ ) calcd for  $\text{C}_{42}\text{H}_{86}\text{AsO}_7$  [ $\text{M}(\text{OH}, \text{OCH}_3) + \text{H}$ ] $^+$ : 777.56, found: 799.88, calcd for  $\text{C}_{42}\text{H}_{85}\text{AsNaO}_7$  [ $\text{M}(\text{OH}, \text{OCH}_3) + \text{Na}$ ] $^+$ : 799.54, found: 799.832, calcd for  $\text{C}_{43}\text{H}_{88}\text{AsO}_7$  [ $\text{M}(\text{OCH}_3, \text{OCH}_3) + \text{H}$ ] $^+$ : 791.57, found: 791.84, calcd for  $\text{C}_{43}\text{H}_{87}\text{AsNaO}_7$  [ $\text{M}(\text{OCH}_3, \text{OCH}_3) + \text{Na}$ ] $^+$ : 813.56, found: 813.87, calcd for  $\text{C}_{43}\text{H}_{87}\text{AsKO}_7$  [ $\text{M}(\text{OCH}_3, \text{OCH}_3) + \text{K}$ ] $^+$ : 829.53, found: 829.85, calcd for  $\text{C}_{86}\text{H}_{174}\text{As}_2\text{KO}_{14}$  [ $2\text{M}(\text{OCH}_3, \text{OCH}_3) + \text{K}$ ] $^+$ : 1604.10, found: 1604.75.

***rac*-2,3-bis(octadecyloxy)propanoic acid (24) vs *rac*-2-(2,3-bis(octadecyloxy)ethylarso-nic acid [As-Lipid] (27)**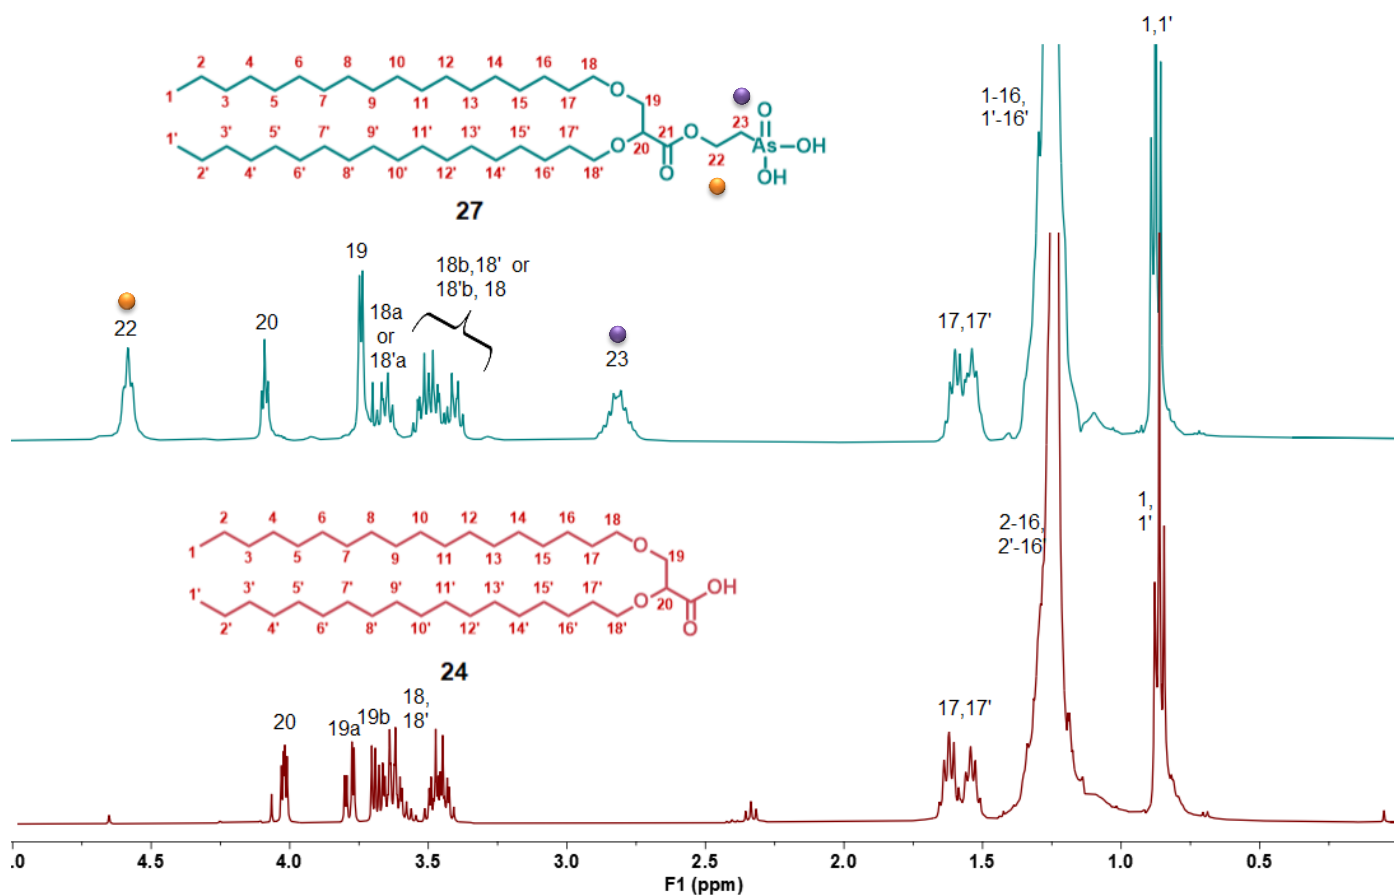

**Figure S15.**  $^1\text{H}$  NMR of *rac*-2,3-bis(octadecyloxy)propanoic acid (24) vs  $^1\text{H}$  NMR of *rac*-2-(2,3-bis(octadecyloxy)ethylarsonic acid [As-Lipid] (27) in  $\text{CDCl}_3$ , as analyzed in Figure S11 and Figure S12.

*Cholesterol-3-O-succinic acid monoester (29)*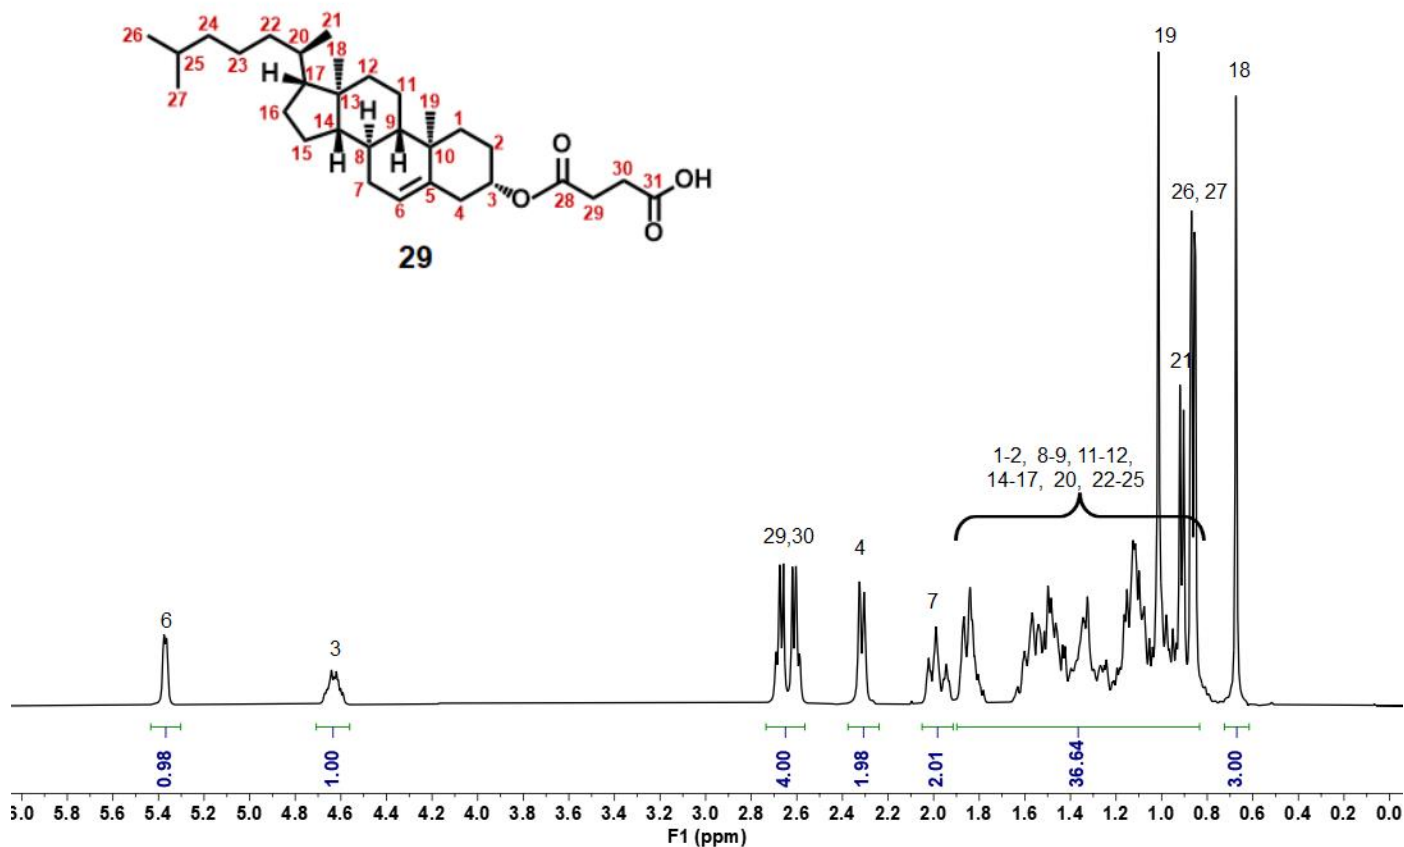

**Figure S16.**  $^1\text{H}$  NMR of cholesterol-3-O-succinic acid monoester (29) in  $\text{CDCl}_3$ .

$^1\text{H}$  NMR (400 MHz,  $\text{CDCl}_3$ )  $\delta$  (ppm): 5.37 (d,  $^3J_{\text{H}_6\text{H}_7\text{a}} = 5.0$  Hz,  $^3J_{\text{H}_6\text{H}_7\text{b}} = 0$  Hz, 1H;  $\text{H}_6$ ), 4.68–4.55 (m, 1H;  $\text{H}_3$ ), 2.72–2.56 (m, 4H;  $\text{H}_{29}$ ,  $\text{H}_{30}$ ), 2.31 (d,  $^3J_{\text{H}_3\text{H}_4} = 8.1$  Hz, 2H;  $\text{H}_4$ ), 2.05–1.92 (m, 2H;  $\text{H}_7$ ), 1.90–0.85 (overlapping signals, 36H;  $\text{H}_{1-2}$ ,  $\text{H}_{8-9}$ ,  $\text{H}_{11-12}$ ,  $\text{H}_{14-17}$ ,  $\text{H}_{19-27}$ ), 1.01 (s, 3H;  $\text{H}_{19}$  overlapped with other signals), 0.91 (d,  $^3J_{\text{H}_{20}\text{H}_{21}} = 6.5$  Hz, 3H;  $\text{H}_{21}$  overlapped with other signals), 0.88–0.85 (two doublets,  $^3J_{\text{H}_{25}\text{H}_{26}} = ^3J_{\text{H}_{25}\text{H}_{27}} = 6.7$  Hz, 6H;  $\text{H}_{26-27}$ ), 0.67 (s, 3H;  $\text{H}_{18}$ ).



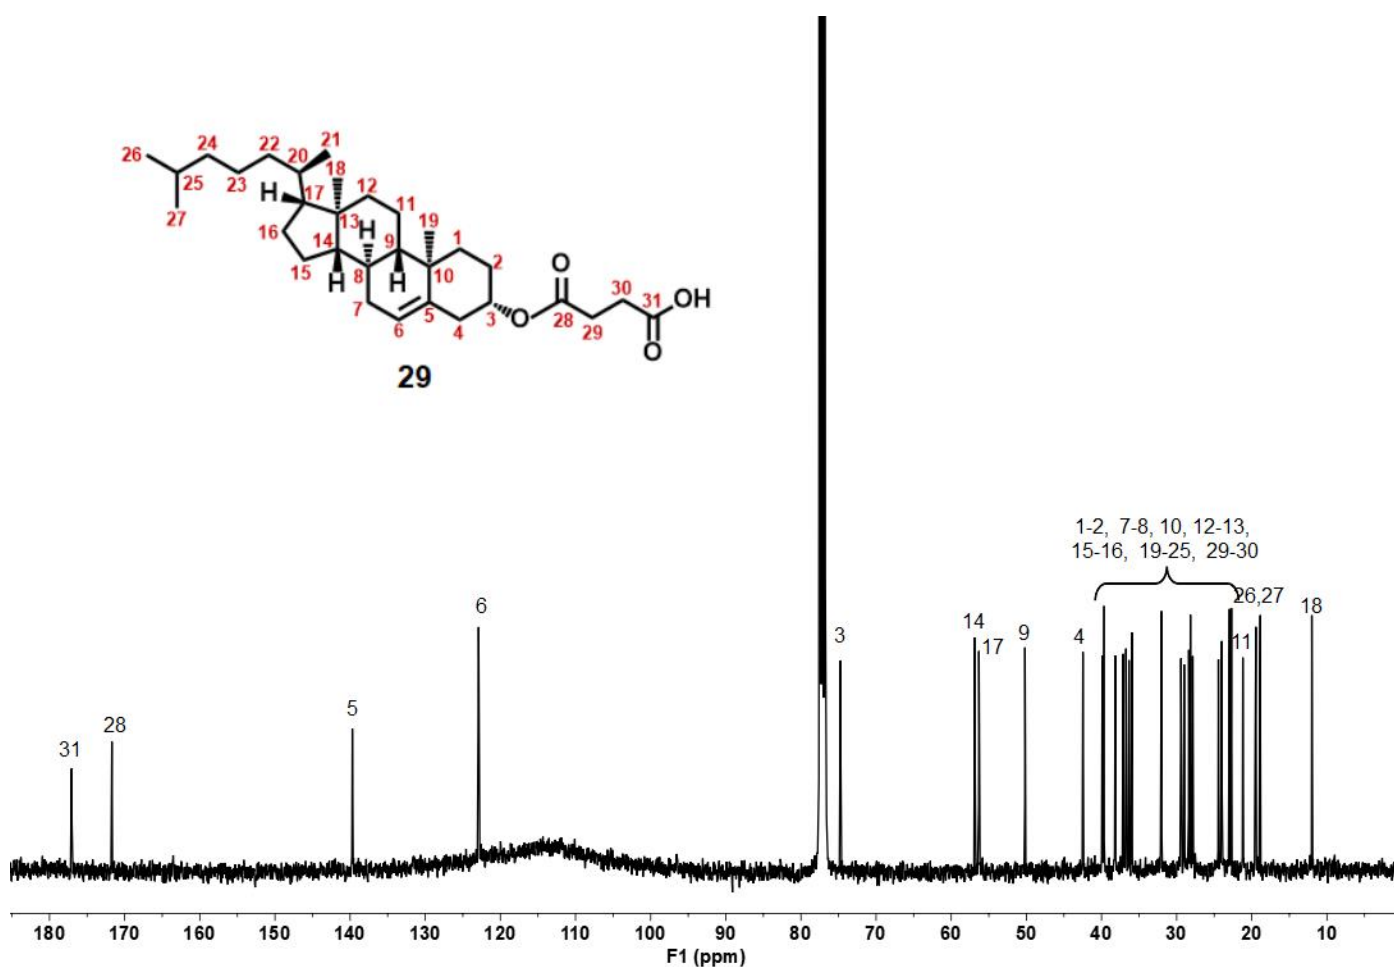

**Figure S17.**  $^{13}\text{C}$  NMR of cholesterol-3-O-succinic acid monoester (29) in  $\text{CDCl}_3$ .

$^{13}\text{C}$  NMR (101 MHz,  $\text{CDCl}_3$ )  $\delta$  (ppm): 177.1 ( $\text{C}_{31}$ ), 171.7 ( $\text{C}_{28}$ ), 139.7 ( $\text{C}_5$ ), 122.9 ( $\text{C}_6$ ), 74.7 ( $\text{C}_3$ ), 56.9 ( $\text{C}_{14}$ ), 56.3 ( $\text{C}_{17}$ ), 50.2 ( $\text{C}_9$ ), 42.5 ( $\text{C}_4$ ), [39.9, 39.7, 38.2, 37.1, 36.7, 36.4, 36.0, 32.1, 32.0, 29.4, 29.0, 28.4, 28.2, 27.9, 24.4, 24.0, 23.0, 22.7, 21.2 ( $\text{C}_{1-2}$ ,  $\text{C}_{7-8}$ ,  $\text{C}_{10}$ ,  $\text{C}_{12-13}$ ,  $\text{C}_{15-16}$ ,  $\text{C}_{19-25}$ ,  $\text{C}_{29-30}$ )], [19.5 and 18.9 ( $\text{C}_{26}$  and  $\text{C}_{27}$ )], 12.0 ( $\text{C}_{18}$ ).

ESI-MS ( $m/z$ ) calcd for  $\text{C}_{31}\text{H}_{50}\text{NaO}_4$  [ $\text{M}+\text{Na}$ ] $^+$ : 509.36, found: 509.91, calcd for  $\text{C}_{31}\text{H}_{50}\text{O}_4\text{K}$  [ $\text{M}+\text{K}$ ] $^+$ : 525.33, found: 525.82, calcd for  $\text{C}_{62}\text{H}_{100}\text{NaO}_8$  [ $2\text{M}+\text{Na}$ ] $^+$ : 995.73, found: 996.11.

## As-Chol (32)

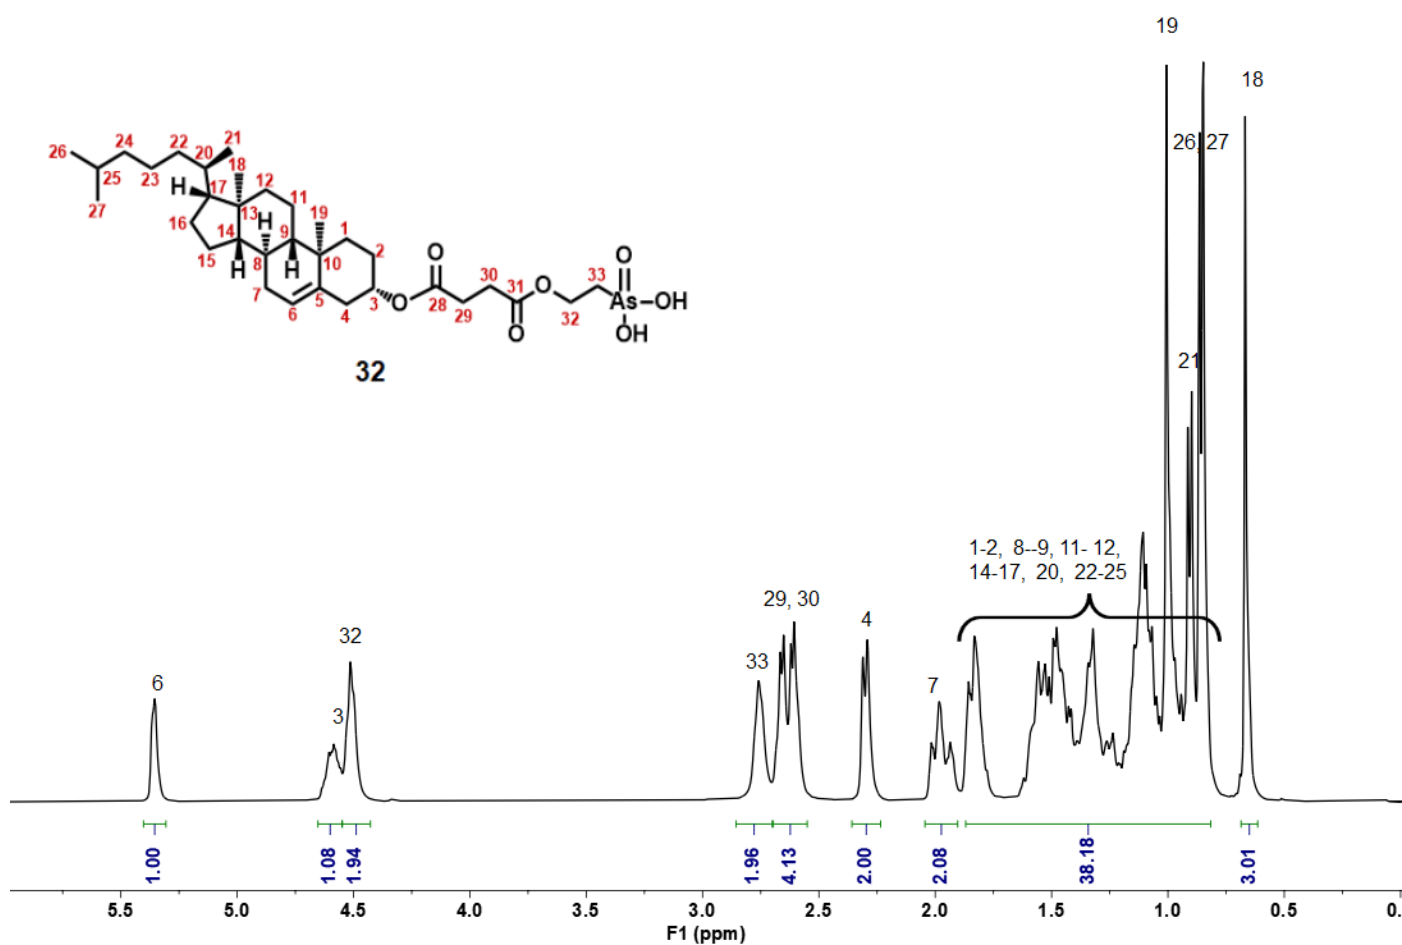

**Figure S18.**  $^1\text{H}$  NMR of As-Chol (32) in  $\text{CDCl}_3$ .

$^1\text{H}$  NMR (400 MHz,  $\text{CDCl}_3$ )  $\delta$  (ppm): 5.36 (d,  $^3J_{\text{H6H7a}} = 5.1$  Hz,  $^3J_{\text{H6H7b}} = 0$  Hz, 1H; H<sub>6</sub>), 4.67–4.55 (m, 1H; H<sub>3</sub>), 4.55–4.40 (t,  $^3J_{\text{H32H33}} = 6.7$  Hz, 2H; H<sub>32</sub>), 2.83–2.70 (m,  $^3J_{\text{H32H33}} = 6.7$  Hz, 2H; H<sub>33</sub>), 2.70–2.54 (m, 4H; H<sub>29</sub>, H<sub>30</sub>), 2.30 (d,  $^3J_{\text{H3H4}} = 8.0$  Hz, 2H; H<sub>4</sub>), 2.05–1.90 (m, 2H; H<sub>7</sub>), 1.89–0.81 (overlapping signals, 36H; H<sub>1-2</sub>, H<sub>8-9</sub>, H<sub>11-12</sub>, H<sub>14-17</sub>, H<sub>19-27</sub>), 1.01 (s, 3H; H<sub>19</sub> overlapped with other signals), 0.91 (d,  $^3J_{\text{H20H21}} = 6.4$  Hz, 3H; H<sub>21</sub> overlapped with other signals), 0.88–0.82 (two doublets,  $^3J_{\text{H25H26}} = ^3J_{\text{H25H27}} = 6.5$  Hz, 6H; H<sub>26</sub>, H<sub>27</sub>), 0.67 (s, 3H; H<sub>18</sub>).

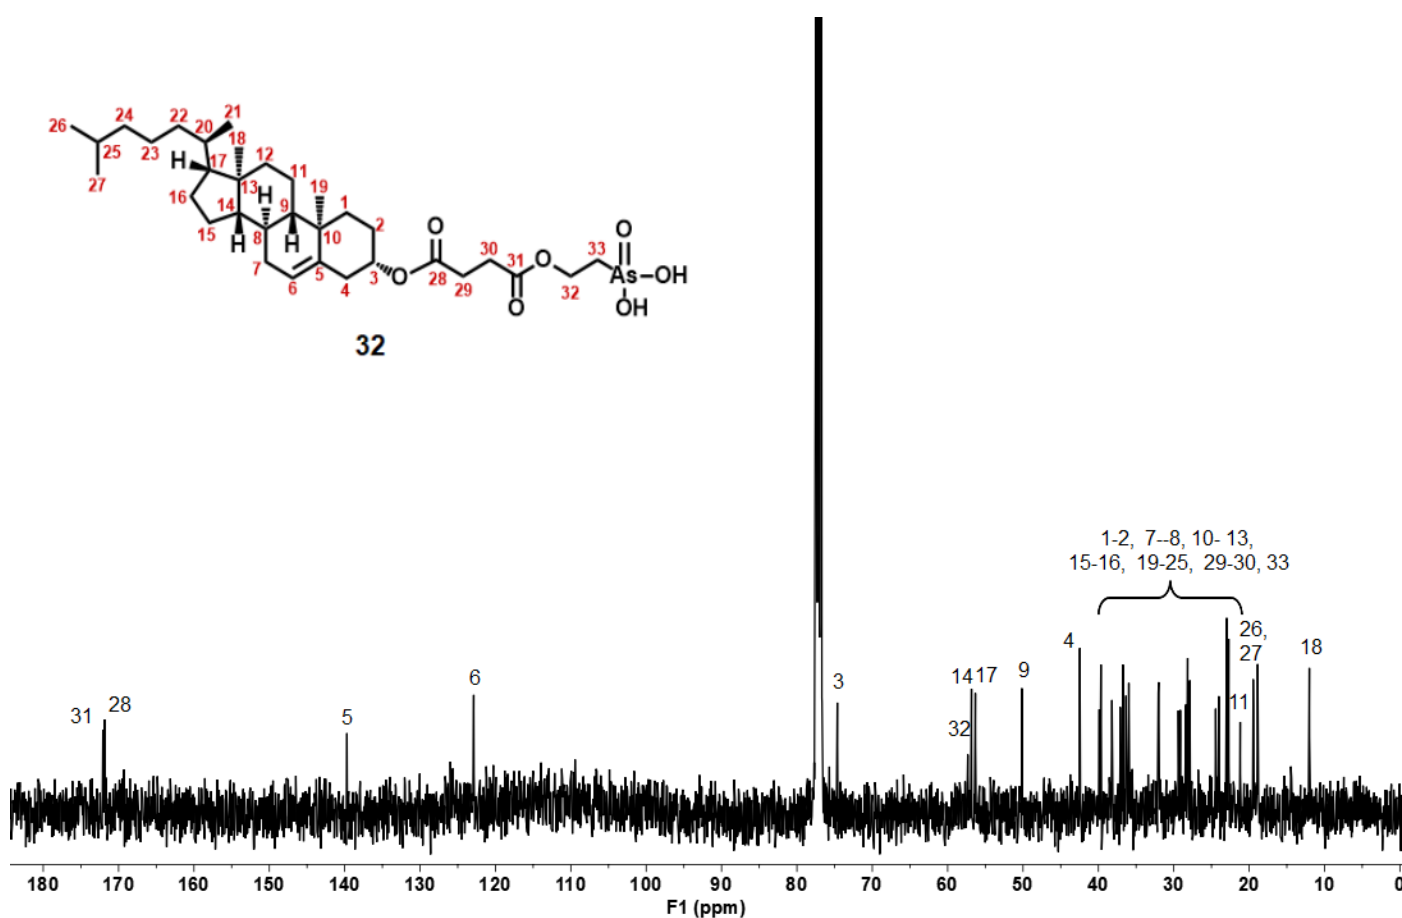

Figure S19.  $^{13}\text{C}$  NMR of As-Chol (32) in  $\text{CDCl}_3$ .

$^{13}\text{C}$  NMR (101 MHz,  $\text{CDCl}_3$ )  $\delta$  (ppm): 172.1 ( $\text{C}_{31}$ ), 171.8 ( $\text{C}_{28}$ ), 139.7 ( $\text{C}_5$ ), 122.9 ( $\text{C}_6$ ), 74.6 ( $\text{C}_3$ ), 57.3 ( $\text{C}_{32}$ ), 56.8 ( $\text{C}_{14}$ ), 56.3 ( $\text{C}_{17}$ ), 50.2 ( $\text{C}_9$ ), 42.5 ( $\text{C}_4$ ), [39.9, 39.7, 38.2, 37.1, 36.7, 36.4, 36.0, 32.1, 32.0, 29.4, 29.1, 28.4, 28.2, 27.9, 24.4, 24.0, 23.0, 22.7, 21.2 ( $\text{C}_{1-2}$ ,  $\text{C}_{7-8}$ ,  $\text{C}_{10-13}$ ,  $\text{C}_{15-16}$ ,  $\text{C}_{19-25}$ ,  $\text{C}_{29-30}$ ,  $\text{C}_{33}$ )], [19.5 and 18.9 ( $\text{C}_{26}$  and  $\text{C}_{27}$ )], 12.0 ( $\text{C}_{18}$ ).

ESI-MS ( $m/z$ ) calcd for  $\text{C}_{34}\text{H}_{57}\text{AsNaO}_7$  [ $\text{M}(\text{OH}, \text{OCH}_3) + \text{Na}$ ] $^+$ : 675.32, found: 675.46, calcd for  $\text{C}_{35}\text{H}_{60}\text{AsO}_7$  [ $\text{M}(\text{OCH}_3, \text{OCH}_3) + \text{H}$ ] $^+$ : 667.36, found: 667.47, calcd for  $\text{C}_{35}\text{H}_{59}\text{AsNaO}_7$  [ $\text{M}(\text{OCH}_3, \text{OCH}_3) + \text{Na}$ ] $^+$ : 689.34, found: 689.49, calcd for  $\text{C}_{35}\text{H}_{59}\text{AsKO}_7$  [ $\text{M}(\text{OCH}_3, \text{OCH}_3) + \text{K}$ ] $^+$ : 705.31, found: 705.69, calcd for  $\text{C}_{70}\text{H}_{118}\text{As}_2\text{NaO}_{14}$  [ $2\text{M}(\text{OCH}_3, \text{OCH}_3) + \text{Na}$ ] $^+$ : 1355.69, found: 1355.71.

*Cholesterol-3-O-Succinic Acid monoester (29) vs As-Chol (32)*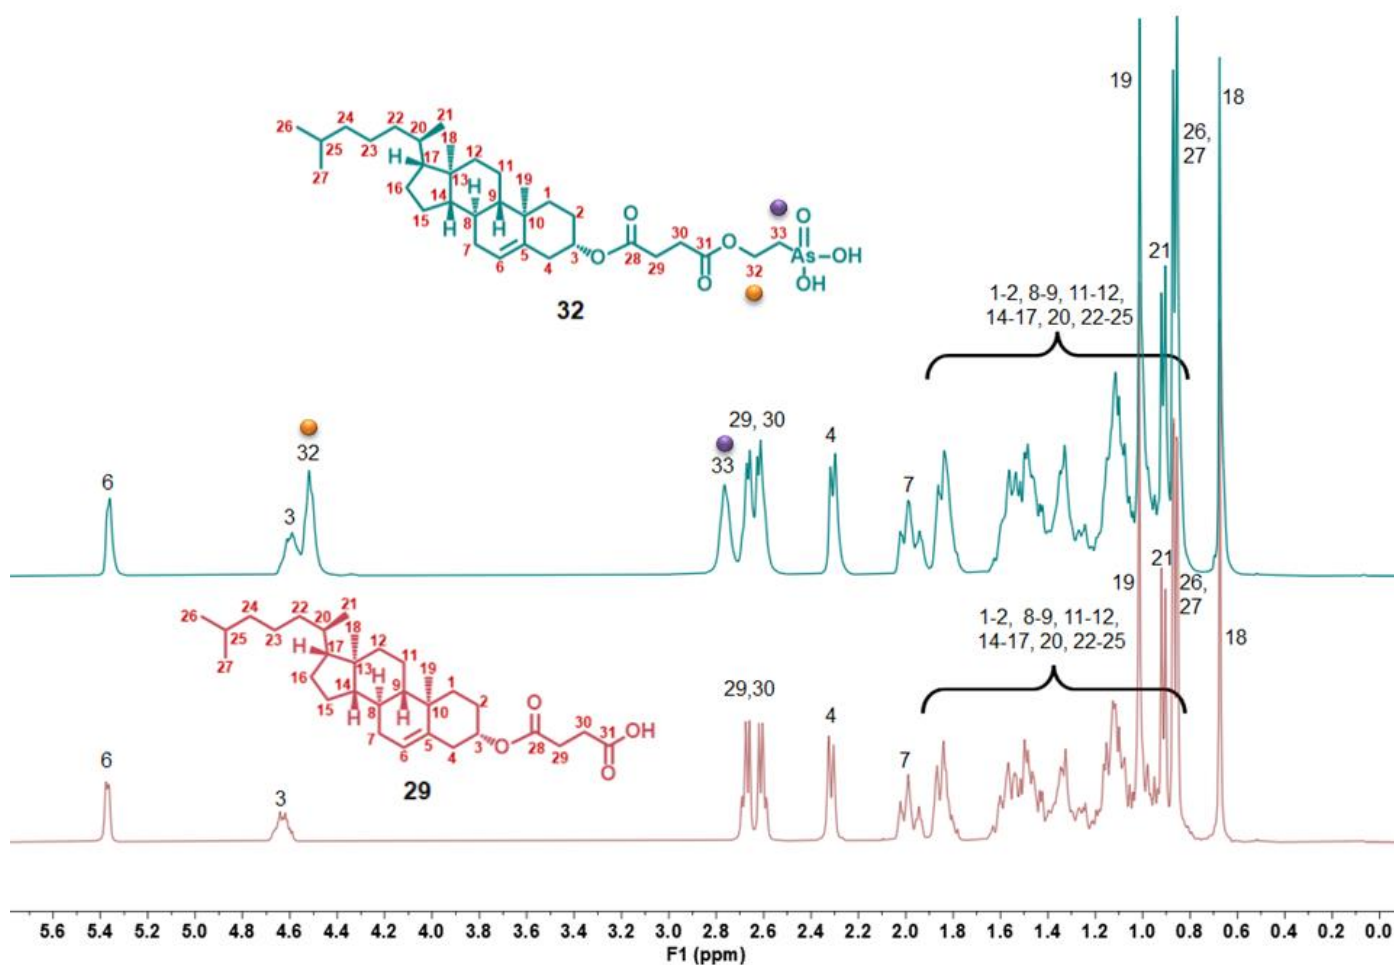

**Figure S20.**  $^1\text{H}$  NMR of Cholesterol-3-O-succinic acid monoester (29) vs  $^1\text{H}$  NMR of As-Chol (32) in  $\text{CDCl}_3$ , as analyzed in Figure S16 and Figure S18.
